# Supplementary material
Source: Research Square preprint supplement (doi:10.21203/rs.3.rs-9543784/v1)
Supplement: Supplementary file 1 [file 911846a5ab99608a9b8d488c.xlsx]

## Sheet: Table S2. P value for PH assump
Table S2 P value for PH assumption test
id	p
EGLN1	0.406846862751963
RIBC2	0.198524912815343
NCAPH2	0.687719235396153
HENMT1	0.065748640436017
CXCL8	0.222700138743499
ITGA5	0.532616635291955
PEAR1	0.585188578957327
OLA1P1	0.640343889926693
CLVS1	0.763098970063957
EGFR-AS1	0.141342268142492
EAF2	0.109604699535991
IKZF3	0.168179749332158
CENPM	0.761917482839283
UBAC1	0.292390065429128
PDF	0.799186991499472
RPL35P1	0.423710193527537
HSD17B10	0.526827257243487
MIR4664	0.682465714007414
ESM1	0.159090243359555
MSMO1	0.503431770709309
HNRNPLP1	0.586657745824311
RPL37AP1	0.872334674582771
SYT16	0.814088437605154
PGK1	0.215313465617573
PTPRB	0.567247173117649
SMYD2	0.154089821054755
FTH1	0.129170171088051
OPN3	0.870261296519807
AC092614.1	0.361635992432036
MCM5	0.769735437607313
PLOD2	0.293164549684789
SLC22A3	0.607787125949424
AL021807.1	0.973505637239028
TLL1	0.296923742954002
SHC1	0.975775489071449
TRAV8-3	0.0779560280399016
RBM38	0.707371755721478
B9D2	0.365386762404859
MIR200B	0.231206693141903
NMRAL1	0.380006525647155
RNASEH2A	0.453253632698384
RPL41P5	0.0589072221573775
APOBEC3H	0.0783010901679097
SNAI3	0.0783336922355657
WNT3A	0.160645819970958
GLTP	0.860160034410234
EREG	0.782333570137869
PPIAP2	0.452458518809175
ADGRG5	0.45329249513395
CHAF1B	0.990772800008612
ANKRD34B	0.225324996114265
EPHB6	0.0571385139604435
L1TD1	0.206595528370269
AGPAT4	0.90988430889329
CXCL2	0.164134997487057
DEF6	0.619343365245308
ASF1B	0.195919451612974
MEI1	0.0869300771320421
UCP2	0.280304604638163
MTMR11	0.810928770392309
NUS1P1	0.814833588568668
NDUFA6	0.758046195570032
NDUFB7	0.601424941529828
AC026403.1	0.228462502634098
MAFK	0.400708095848486
CHAF1A	0.56122379368805
ARRDC5	0.314122749570349
TXNDC12	0.713502138828204
APOO	0.0725945534308056
C1orf74	0.957257744750922
RPS4XP13	0.558887041608178
MOCS1	0.280498647142881
PKD2L1	0.104594032347068
ERG	0.293433729324482
TECRP1	0.754437522312291
FKBP1C	0.430069700290987
ZNF101	0.218303197716346
PCBP1	0.73273908136103
CHD4	0.827777617866308
LINC00629	0.404458569630198
TCAM1P	0.588028517611773
NUDT3	0.471617717908518
TNKS2-AS1	0.595540440970249
TIGD7	0.155070832852863
DDX49	0.782301221017377
TFPI	0.523648389997738
FNDC4	0.402511669316325
LDHC	0.179025479531914
SLFN13	0.697224132620576
RPS10P28	0.847546371347718
SYCE2	0.702129950783832
CSK	0.876271632849592
COX7B	0.508516965747616
TIMM17B	0.498610147672221
NGRN	0.483690723547778
LINC01305	0.0510897644061661
ARHGEF33	0.835564751311486
AKR1A1	0.498760947511483
AP000281.1	0.783875835319767
GNG5	0.158489165193986
APOBEC3F	0.144840036620491
SLC16A3	0.293534260850764
LAGE3	0.251536807427646
RPS19P1	0.0781258509322815
ECI1	0.640467779538087
CXCL3	0.687036390126125
C19orf57	0.108488016995518
SELL	0.0752851852674321
APOBEC3B	0.106042358102587
PSTPIP1	0.181151893687895
LIF	0.953681523800081
ADH1B	0.437223224880034
LINC01089	0.985724449547296
AIDA	0.583050926032763
ANKRD22	0.745180534213942
PFKFB4	0.286555081776134
FADD	0.607643469455015
GOT1	0.761425204830455
DNM3OS	0.850022118340891
HLF	0.162218331139598
TARDBP	0.192890221424768
TRAV12-1	0.235498303722657
PAPPA	0.767551020536973
DDX39A	0.180555468238822
CCDC116	0.0866494674603022
IL21R-AS1	0.751146316235151
POT1-AS1	0.44832225273591
HMCES	0.0690741339332054
RPS10P16	0.407733915308491
IER5L	0.378179048222863
PAEP	0.196858152034266
ANKRD19P	0.636673996339118
INSL3	0.310780799988216
ANGPTL6	0.80690182869832
CRLS1	0.713964513819734
OPRD1	0.991143750097718
VMA21	0.892491527476232
PCDHGB3	0.460395434801322
APEX2	0.625252938391242
KEAP1	0.141711080930434
TSSK5P	0.159475919410902
MRPL40	0.241178517359662
NAALAD2	0.131780373824171
ARPC1B	0.761376535810268
LHX2	0.0783442887787353
DLL4	0.207726761758234
EFNA1	0.203881145898089
DSG2	0.851024933294746
FGD3	0.492945247467054
DNASE2	0.273410252772699
MIR4258	0.379806949472294
LINC01301	0.348789401860463
SCN2A	0.0572113064026156
STAP2	0.547536318629598
ZIC2	0.737578978636755
FOXD3-AS1	0.235602706340581
RFC5	0.932188233282907
MIR200A	0.541611950011245
PTPN7	0.055930132248259
RPS15P5	0.423910207455387
TNF	0.0977416167646755
UBASH3A	0.0652173777583549
COMMD4	0.815198821351551
IL17C	0.548408134983791
LINC00158	0.225692629477425
MAP7	0.275936113652781
RPS4XP14	0.68450232542416
MIR100HG	0.463419034678607
PCDHB5	0.428353762277601
WDR45	0.544525654090964
AK4	0.740352428247275
RNF6	0.105844581293149
TRBV6-5	0.0594136111879236
SLC15A3	0.213746141853688
SPP1	0.134930175544383
FAHD2A	0.36537343133623
ATF5	0.288049222531888
CXCL1	0.290808219086131
DAAM2	0.152939754868894
PLA2G2D	0.0883769866037579
HNRNPA3P5	0.11612879228809
DHCR7	0.0804846149284755
FOXRED2	0.207761456164976
PPIAP13	0.876864924711402
RPL12P38	0.146952840913206
SHF	0.0804464574807497
RHOH	0.0600895380239745
AL353662.1	0.258076653674137
CRTAM	0.0869201515868191
BDH1	0.170510438797356
LDHA	0.0917562935676703
TFRC	0.325188622092214
HOXA1	0.176498014271239
TP73	0.122343269634215
HSPA5	0.43243971933065
WWC2-AS2	0.32562246967222
TEX41	0.444104896978591
ITGAE	0.212003731070526
TCP11	0.0652436848777825
IL12RB1	0.164208159215869
MMP3	0.708199529380907
TRDV1	0.128165607059843
IGSF6	0.379371380839014
AC119403.1	0.605241368187551
HEIH	0.30350112604309
MPEG1	0.165299383229381
AC012368.1	0.288733988630587
TCL1A	0.0555165202889546
TRBV2	0.0640993137314006
HNRNPA1P12	0.310811732174153
RENBP	0.398589020636013
SERPINA3	0.804093265669205
RPS4XP11	0.411889589825255
CCDC144A	0.850062789052118
TMPO-AS1	0.120484922499015
ITM2A	0.0540124032961359
LINC01337	0.160021928140271
OR2B6	0.7904569216778
SIT1	0.0666742698134686
DDIT4	0.273077862596015
RPL15P20	0.492194256345083
AC023283.1	0.771246136141364
RPS4XP2	0.981039998061239
FCRL3	0.074166521059409
HSPB11	0.646743631446957
BCL2	0.840117961055882
AC019117.1	0.677306911979433
LIMD2	0.252319386374118
POMZP3	0.962845509209383
LY86	0.34984461381514
CXCR3	0.0511014401362379
EBF2	0.600150280930413
TMEM255B	0.395361559739767
FAM27E3	0.993113004734674
COA3	0.812400081388434
AL360178.1	0.909872019540321
LINC01213	0.247319104272108
ASS1P1	0.172446845609677
RBM8B	0.144601152350065
TBX21	0.0996680663178763
IL12A	0.0910114448224109
HSPB1P1	0.0727047993430907
CCDC34	0.99966293260129
AL590764.1	0.0703399463043691
NDUFA12	0.347788036933624
SAMD1	0.170654183019244
ALG1L	0.55889632034899
WWC2	0.621406921698502
ATF4P3	0.384116363540324
ASGR2	0.450495436561998
RPL35P5	0.795803320194851
OVCH1-AS1	0.327042602529219
AC106795.1	0.835012150102056
TTC24	0.101723042710603
TREM1	0.94699053621893
SOGA3	0.527285416876704
SOX21	0.0527895410323378
VGLL3	0.348409816751138
LINC00862	0.758507242781847
GZMM	0.0765503568470164
RIMS4	0.854408946379818
MYO1G	0.18538715964987
ARMC7	0.170918204761046
RPL41P2	0.361669637549496
NAP1L1P3	0.56001301678328
NDUFB4	0.304986319763839
PARL	0.563808441641865
STAC3	0.648307102211675
MCAM	0.276599882843717
ROR1	0.39147444202806
CXCR2P1	0.0618015130131873
SP9	0.422891546691832
DMBT1	0.742715578039225
FTLP2	0.245086188561192
EFCAB1	0.187502563986204
TLR10	0.0848887779449378
PTGS2	0.467546795415135
AIG1	0.57648771118324
ARHGAP8	0.0732716431547784
AKNA	0.0602333381075986
LST1	0.110588227974467
PLEKHA8P1	0.15115840839312
ARRB2	0.137736566596579
AC008753.1	0.512215510107324
M1AP	0.481882526839863
AL121992.1	0.146047223351504
TEX30	0.769273472130909
RBX1	0.62694754367947
ZYG11A	0.852688876719839
IGFLR1	0.0590279319760514
SPC24	0.0991244663081241
LATS2	0.232514035989425
AC012306.2	0.478652438198516
SNORD101	0.153166067655449
SMCO4	0.162748140928615
RPSAP4	0.340375508069065
RPL36AP26	0.0519483127627925
ERICH6B	0.778098331763181
FAM91A3P	0.635799959595108
SLAMF1	0.0638803383533832
AC006449.2	0.594929589114827
STARD4-AS1	0.467528002974752
MS4A6A	0.177080819781059
BLOC1S1	0.403057211175933
PFKP	0.300413817802588
TSPAN33	0.385269911735741
ZNF490	0.113288761364178
NDUFA1	0.379504435652164
TRBV29-1	0.0720718988156165
TRBV24-1	0.102225303717276
ZFP36L2	0.381848594653131
RPS10P2	0.415530594285525
SLC12A3	0.330811812092962
CH17-340M24.3	0.855918321790232
KIF22	0.688256574546196
NDUFB6	0.201779347096622
RNU5B-2P	0.0551203388333938
RPS4XP3	0.786497124243912
CHTF8	0.750874388113555
RPS26P31	0.970239976877403
NABP2	0.465811923480924
SMAP1	0.143699802593447
TAF7L	0.0539163931008261
GCKR	0.349339926962431
MYO1B	0.720021794677909
WASH4P	0.579942706724105
RPS15AP24	0.267091418645823
TGFA	0.808033591767552
UQCRFS1P1	0.130144903891483
ZNF541	0.0796670275922978
PCDHB12	0.122801169449273
FAM3B	0.328806723987276
OSR2	0.933300565668483
TNFAIP8L2	0.124746030446218
SLC25A33	0.404143728869897
RPS2P48	0.190744604068578
SLC25A5	0.324006348555566
P2RY13	0.42095965148196
CORO7	0.783947381977517
ACYP1	0.468573643016827
ADI1	0.449526284279661
HMX2	0.675911510684457
CHST7	0.694715129501758
SLC4A11	0.0565651307788231
AC006272.1	0.360694390854597
IL21R	0.186735595228108
HNRNPUP1	0.155904493503432
BACE2	0.810620207364597
MSRB3	0.695895588631283
CCL20	0.0665853188406252
EEF1A1P24	0.520568854245153
GPR174	0.0858033539196542
ELMOD1	0.806992632362202
AC009065.4	0.655963232055168
SEC61G	0.132631387041362
GMPSP1	0.931813541016881
RPL10P15	0.391014308841405
MFSD2B	0.718072759221129
TOMM20L	0.531636261942505
GPR143	0.507300095720905
NAA38	0.586613
CPLX1	0.660408487773448
CBX7	0.0917133124098535
