# Supplementary material
Source: Research Square preprint supplement (doi:10.21203/rs.3.rs-9543784/v1)
Supplement: Supplementary file 2 [file d578451f7ebcea7f4b82fb93.docx]

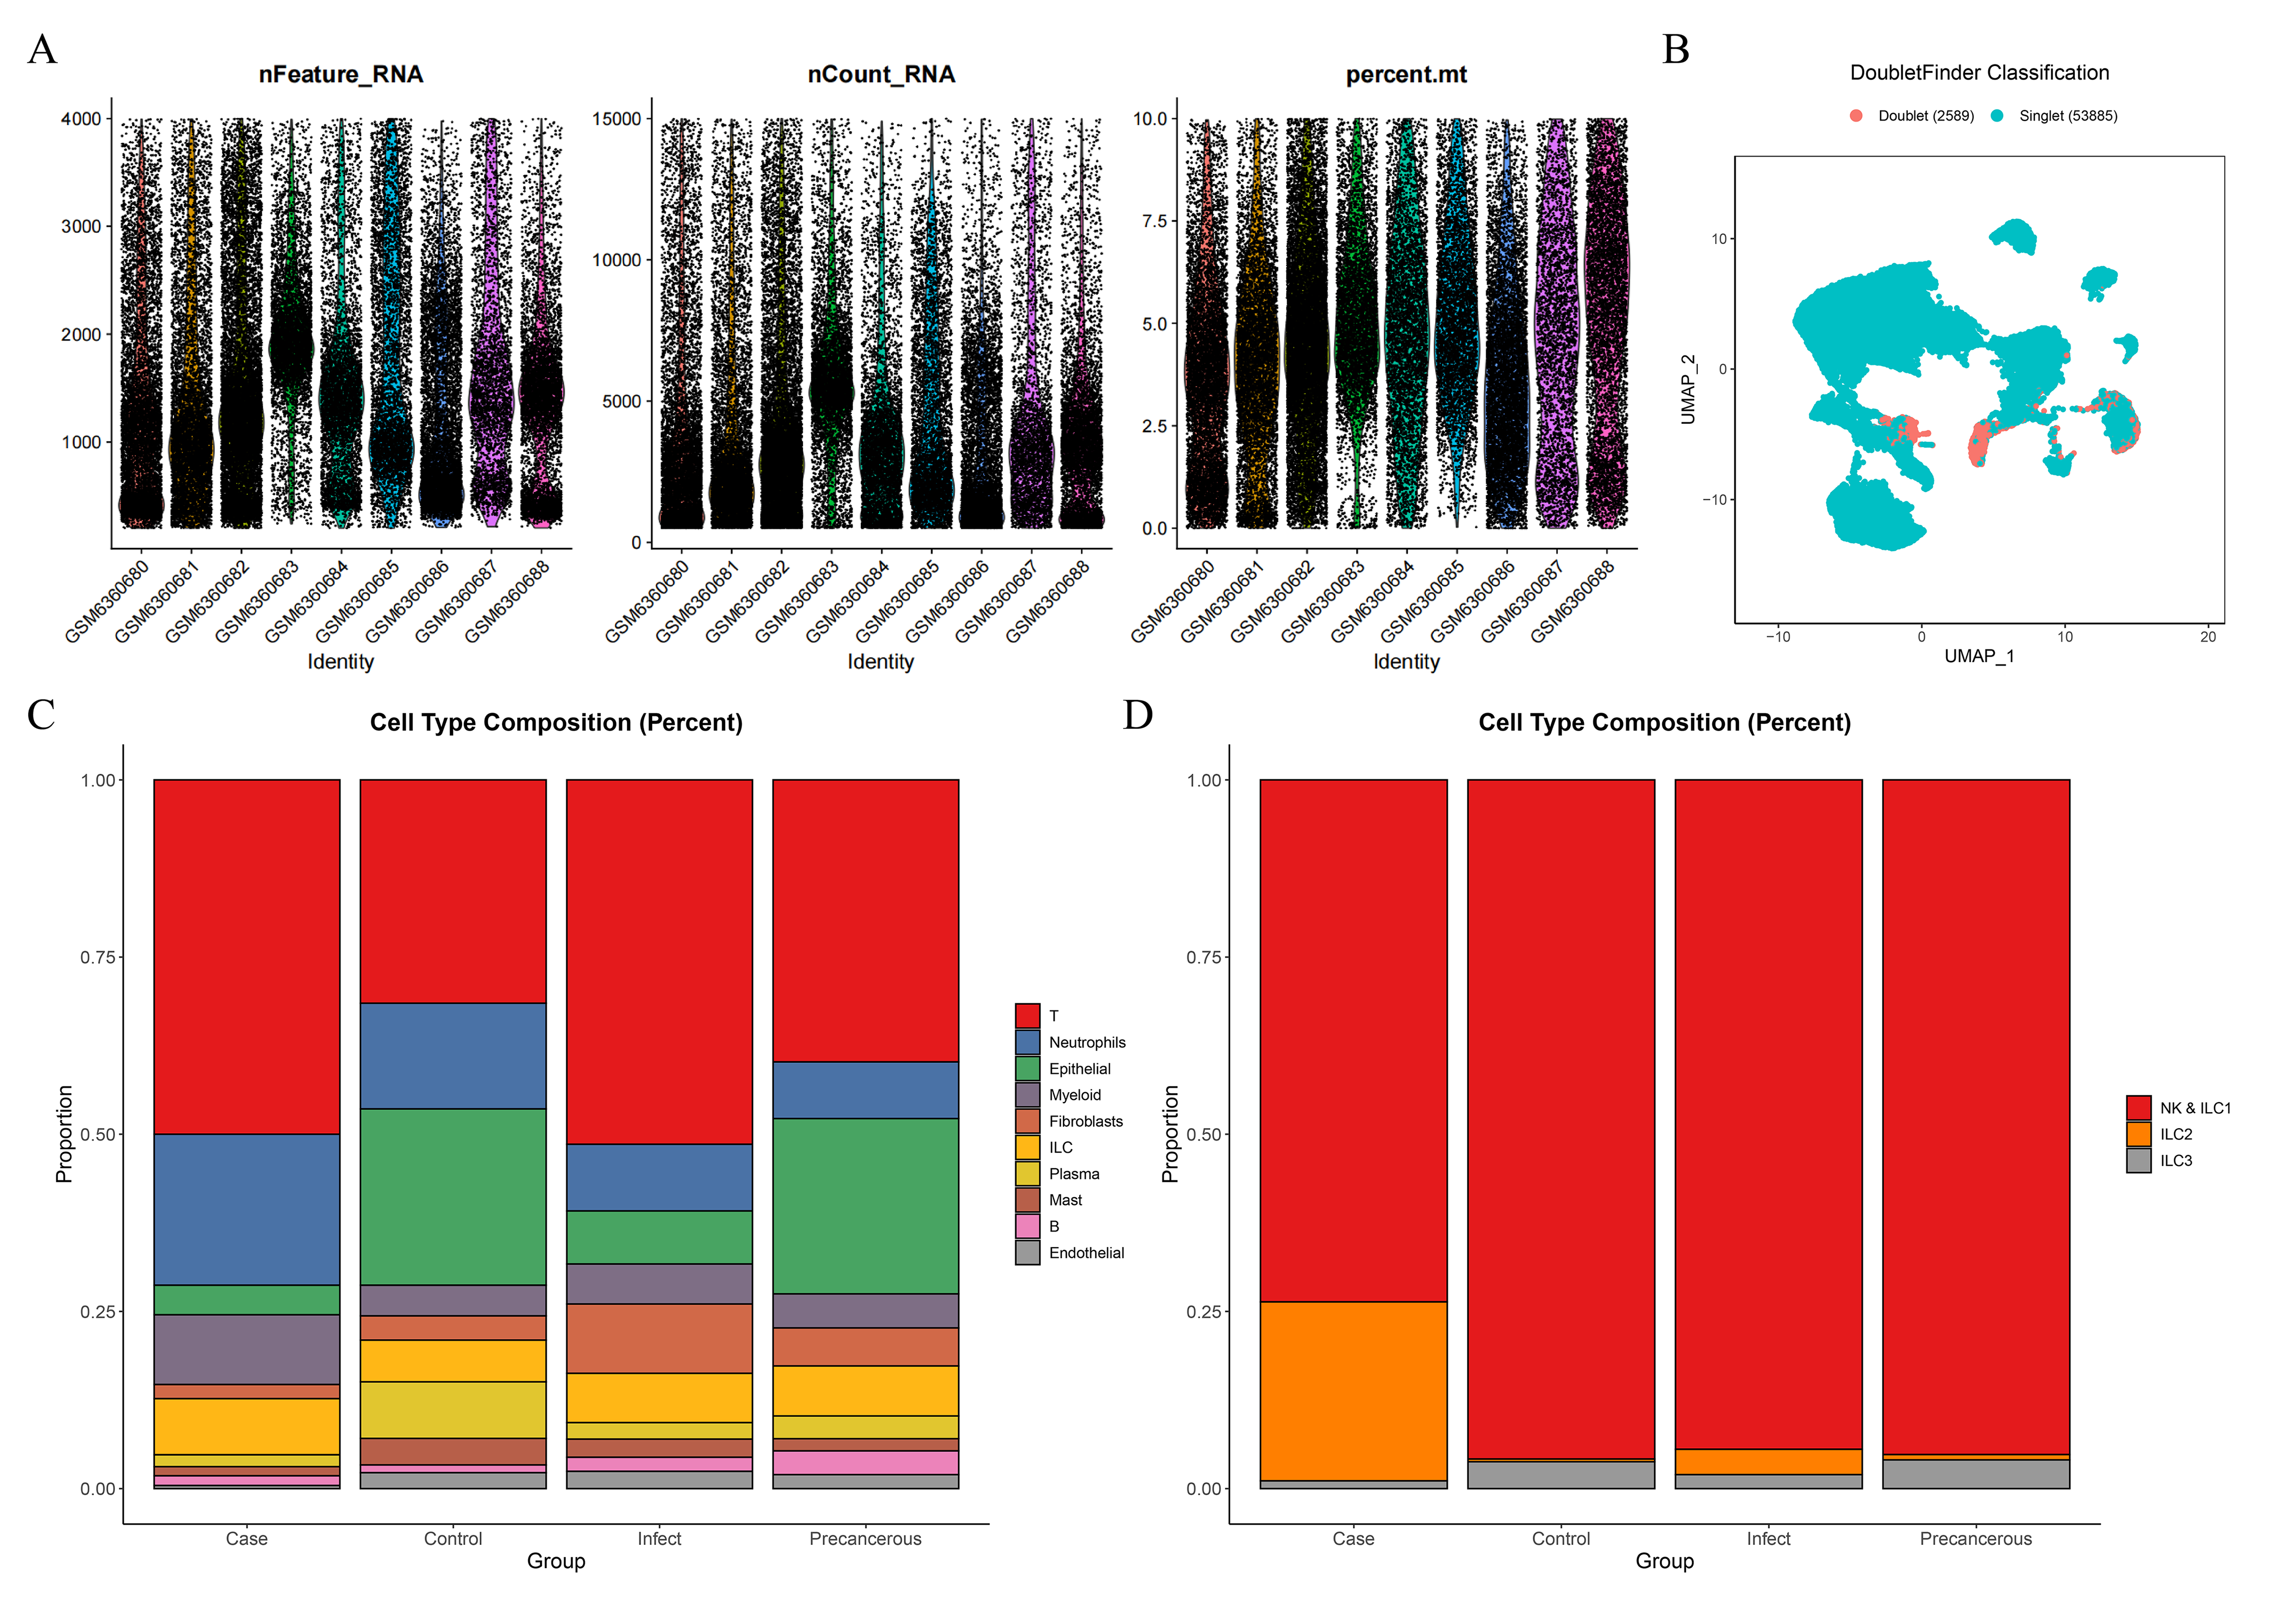


**Fig. S1** Single-cell analysis. (**A**) The quality control for single-cell RNA sequencing (scRNA-seq) data of cervical cancer (CC). (**B**) The identification and elimination of doublets. (**C-D**) The proportion of cell types (C) and subtypes (D). between CC, control, HPV-infected , and precancer samples.


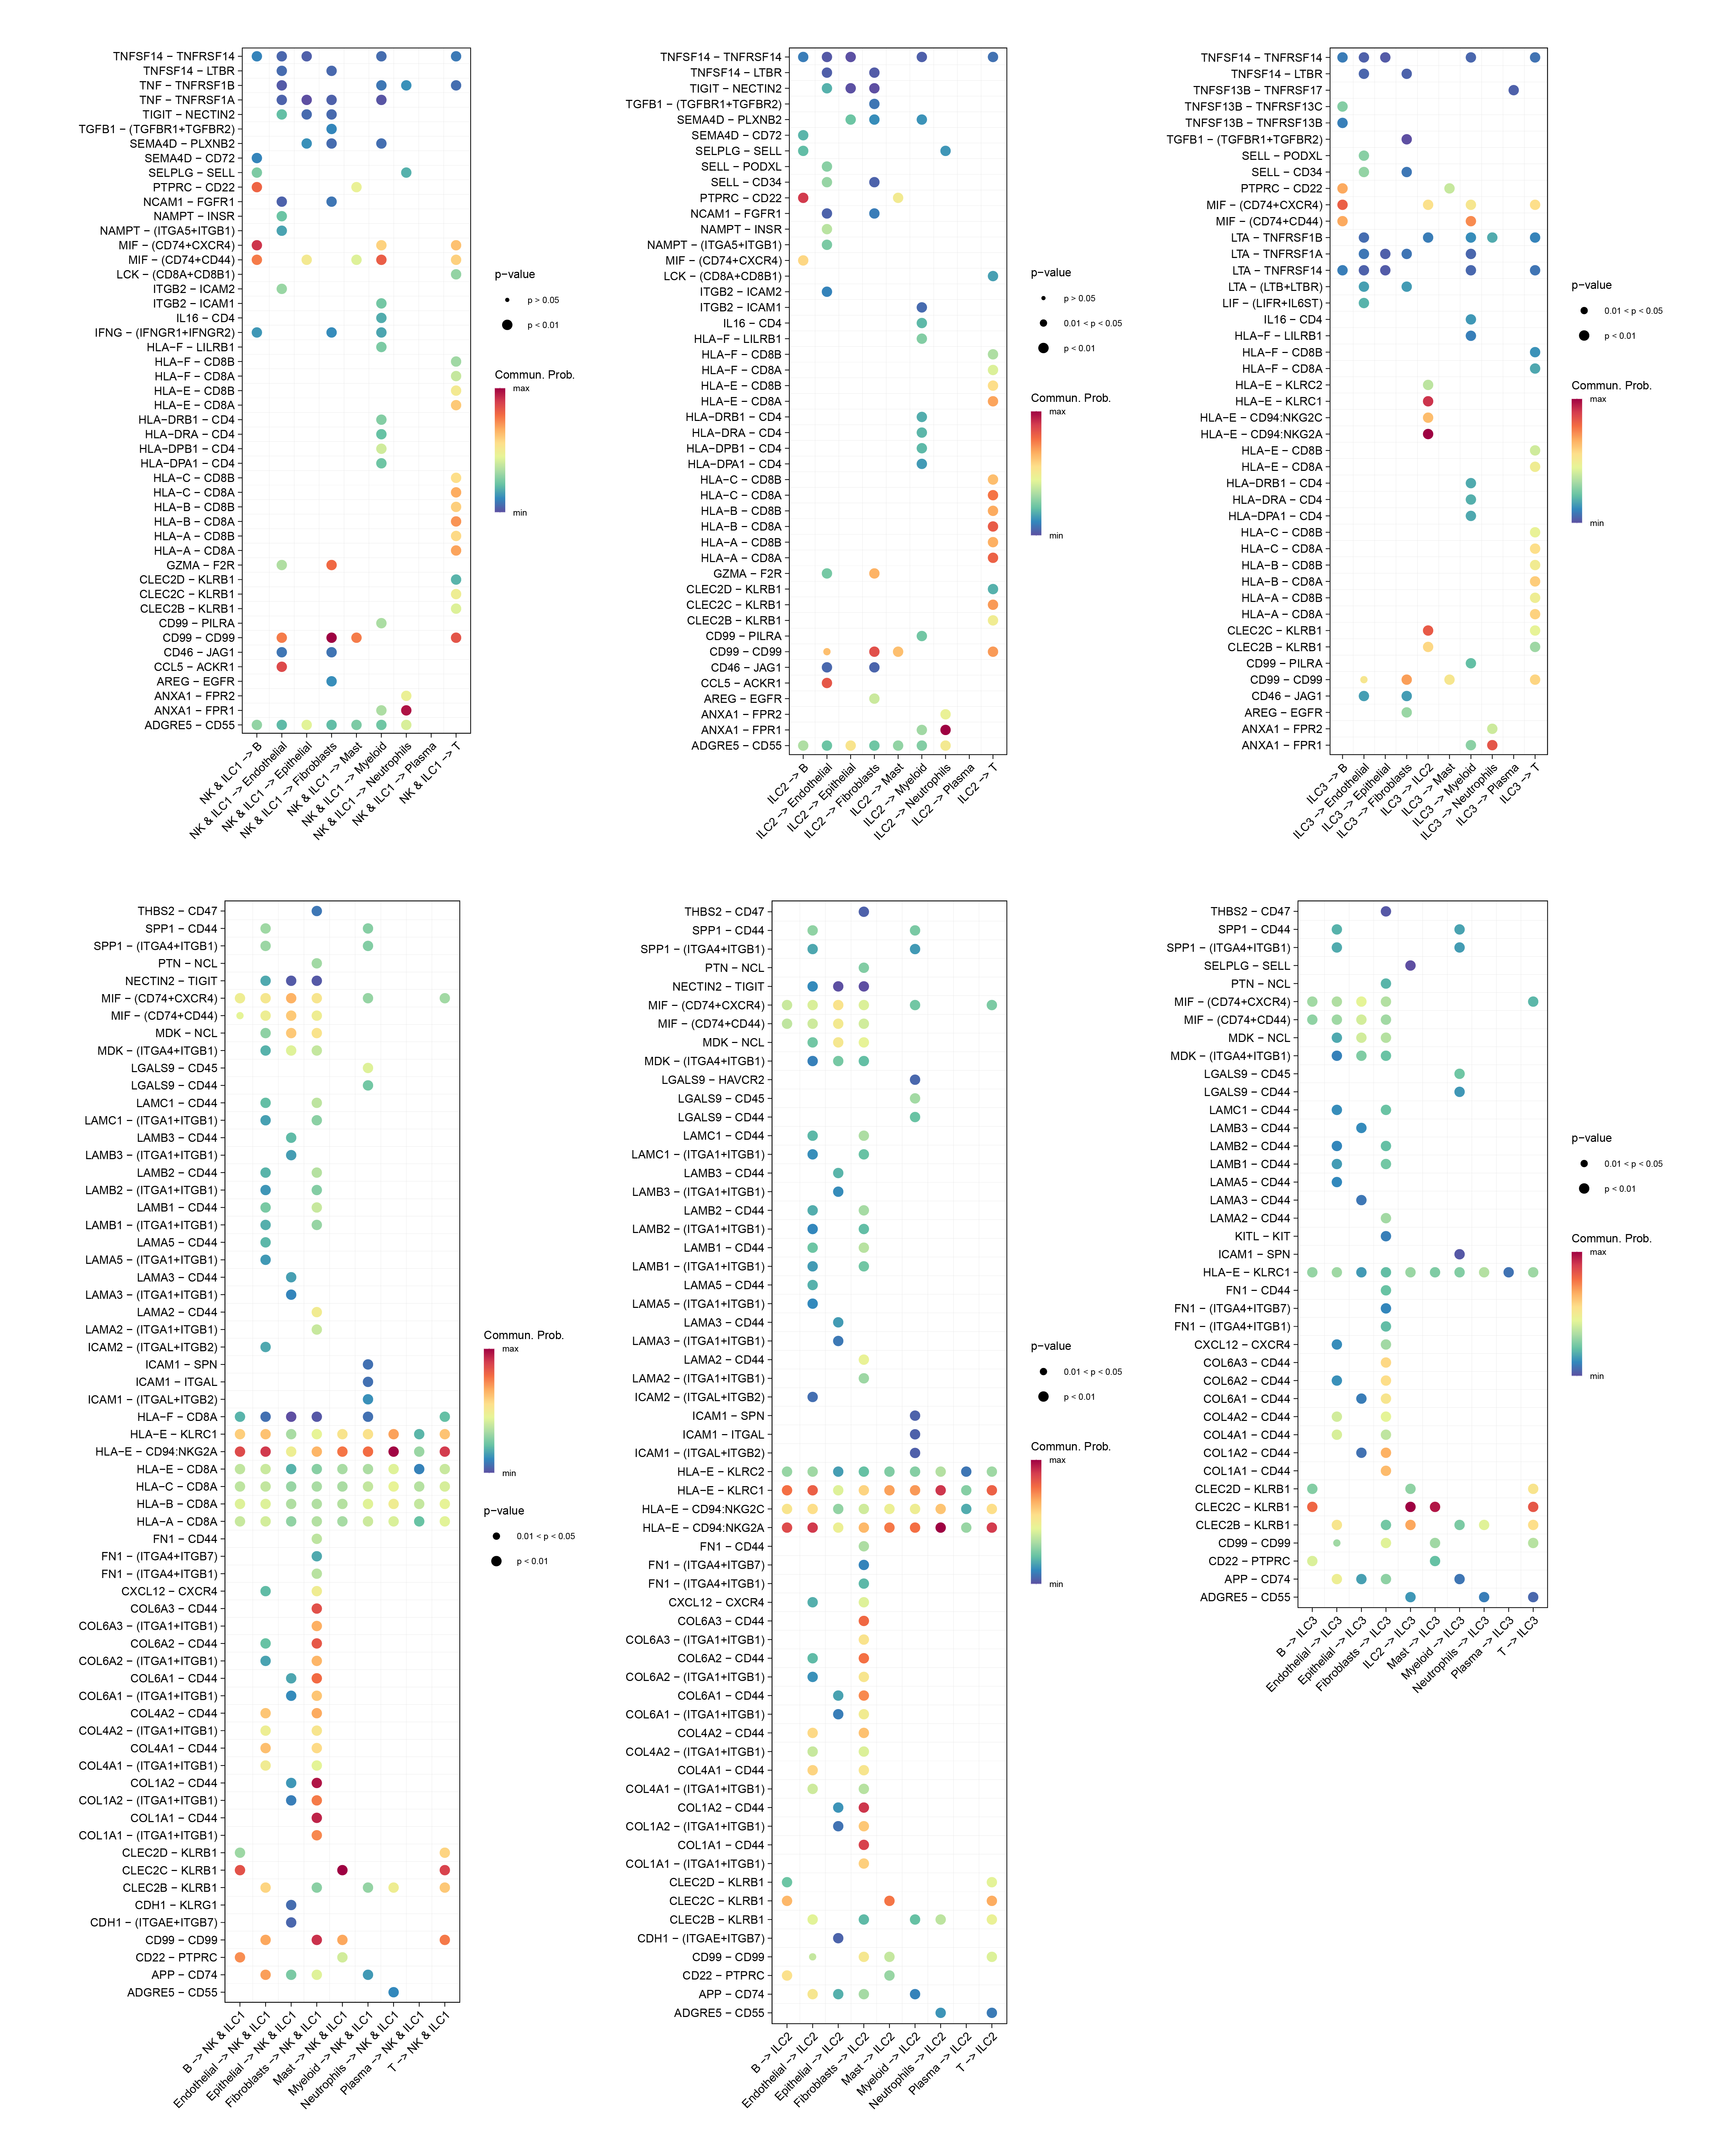


**Fig. S2** The signaling pathways during cell communication analysis among cell types and subtypes.
