# Supplementary material
Source: Research Square preprint supplement (doi:10.21203/rs.3.rs-9543784/v1)
Supplement: Supplementary file 3 [file b20d000bec8375559bd44271.xlsx]

## Sheet: Table S3. The differential drug
Table S3 The differential drug sensitivity between high- and low-risk groups
	pvalue
Camptothecin_1003	0.00014379765875528
Cisplatin_1005	0.000712270066184206
Cytarabine_1006	0.0114043752222192
Navitoclax_1011	0.000212180412746707
Vorinostat_1012	0.00482895563312357
Nilotinib_1013	0.000514353680046867
Olaparib_1017	0.00221386644231695
Axitinib_1021	0.0211629133230229
AZD7762_1022	0.000121050663784916
PLX-4720_1036	0.0162593711333367
Wee1 Inhibitor_1046	0.035914039745185
Alisertib_1051	0.0261698715513592
MK-2206_1053	0.00151127113691551
Palbociclib_1054	2.64797120155447e-05
Dactolisib_1057	8.84303319199091e-08
AZD8055_1059	2.62251717217279e-07
5-Fluorouracil_1073	0.00186261852248361
Rapamycin_1084	5.65208103988434e-05
Sorafenib_1085	2.72586304223768e-06
Irinotecan_1088	1.28342869059617e-05
Oxaliplatin_1089	2.85521764691803e-05
GSK1904529A_1093	0.00574604080764368
PF-4708671_1129	3.34798561950405e-08
PRIMA-1MET_1131	4.27884041359259e-06
Niraparib_1177	0.00541684017973214
MK-1775_1179	0.0418680973794196
Gemcitabine_1190	0.000443912079614639
Bortezomib_1191	0.000338066574284027
GSK269962A_1192	2.12188065756994e-05
Tamoxifen_1199	0.00277122894781955
Fulvestrant_1200	0.0258136369153839
EPZ004777_1237	0.00821892845128271
Talazoparib_1259	0.000490656426763549
XAV939_1268	0.0190825804428932
Dabrafenib_1373	0.00218329630840155
Temozolomide_1375	0.013441962306044
IAP_5620_1428	0.0188776521302135
AZD2014_1441	0.000556215392333087
Epirubicin_1511	0.000465514163567109
Cyclophosphamide_1512	0.0146556355052989
Pevonedistat_1529	0.000465514163567109
LCL161_1557	0.0047265548478661
EPZ5676_1563	0.00288640278181115
Leflunomide_1578	1.51277428214927e-07
Entinostat_1593	0.0490450895129804
OSI-027_1594	0.000308359405604776
LGK974_1598	0.000889831872086165
VE-822_1613	0.00684264261952563
CZC24832_1615	0.0127951362504064
PFI3_1620	0.0307745546790002
PCI-34051_1621	0.012746514796397
Wnt-C59_1622	0.000465514163567109
I-BET-762_1624	0.0222339850461696
RVX-208_1625	0.0131400001950531
GSK343_1627	0.0076106519938004
ML323_1629	0.00392282186209337
Entospletinib_1630	0.0438847460822471
PRT062607_1631	0.0374536467906305
Ribociclib_1632	9.61113269362827e-06
AGI-6780_1634	0.000136584343349974
Picolinici-acid_1635	0.0130406573700714
AZD5153_1706	0.0149316114960055
Eg5_9814_1712	0.0472736519862281
IRAK4_4710_1716	0.0436114164272076
JAK1_8709_1718	0.0254614693547172
TAF1_5496_1732	0.00422466112220513
AZD4547_1786	0.00215310932587651
Zoledronate_1802	0.0323442023752259
Oxaliplatin_1806	0.00450806205842106
Topotecan_1808	4.14308097246185e-05
Teniposide_1809	1.79700120201584e-05
Mitoxantrone_1810	7.18398540445076e-05
Dactinomycin_1811	0.0130902473304552
Fludarabine_1813	0.0133912230345548
Fulvestrant_1816	0.00662052250224025
Vincristine_1818	0.0282034048537385
Podophyllotoxin bromide_1825	0.0120361509993143
Dihydrorotenone_1827	0.00246142927187515
Gallibiscoquinazole_1830	0.000930828307771453
Elephantin_1835	5.21741767430441e-06
Sabutoclax_1849	0.000145448366778674
OF-1_1853	0.00435486988626988
KRAS (G12C) Inhibitor-12_1855	0.00193396010575297
Buparlisib_1873	0.0235137191366066
Venetoclax_1909	7.09103476078262e-07
ABT737_1910	0.000488086753386463
Dactinomycin_1911	0.00113487183007748
Afuresertib_1912	0.0400542300503817
AGI-5198_1913	0.00303302231976922
AZD5363_1916	0.0354508814520311
AZD6738_1917	0.00487046661328968
Ipatasertib_1924	0.0363821434594538
GDC0810_1925	0.00648495666534004
GNE-317_1926	7.16845008791852e-06
GSK2578215A_1927	0.0157865017564827
I-BRD9_1928	0.0430688790543103
MIRA-1_1931	0.0146556355052989
P22077_1933	8.83741470284492e-05
Savolitinib_1936	0.0174949233680133
WIKI4_1940	0.0266209366278193
MIM1_1996	0.0300639311395634
WEHI-539_1997	0.00114046169171497
Foretinib_2040	0.00190692110474733
BIBR-1532_2043	0.0176870010073037
Pyridostatin_2044	0.0373333325393152
AMG-319_2045	0.00441176313459508
MK-8776_2046	0.00346759274285195
Vinorelbine_2048	0.0194283308596751
Uprosertib_2106	0.0076106519938004
LJI308_2107	8.33171713868035e-05
GSK591_2110	0.00119191722122969
VE821_2111	0.0049544438691342
AZD6482_2169	0.000530735605605654
AT13148_2170	0.00456673828336735
