# Supplementary material
Source: Research Square preprint supplement (doi:10.21203/rs.3.rs-9543784/v1)
Supplement: Supplementary file 5 [file d9ff341c137bcab333ba6d45.xlsx]

## Sheet: Table S1. Cervical cancer (CC) 
Table S1 Cervical cancer (CC) survival-related genes
id	z	HR	HR.95L	HR.95H	pvalue
EGLN1	5.91361244387825	4.4651897047254	2.71932914998652	7.33192563293947	3.34684859695277e-09
RIBC2	-4.65423	0.551299287303619	0.429024375647841	0.70842339371168	3.25190060939007e-06
MIR210	4.6193943462594	1.74608609884775	1.37835014882342	2.2119319007524	3.84861790214193e-06
NCAPH2	-4.53726	0.392345363684008	0.261905805561364	0.587749034712673	5.69902029409906e-06
HENMT1	-4.43909	0.520991628308736	0.390665253191759	0.694795031168423	9.03398453249964e-06
CXCL8	4.38091227039434	1.32499189814202	1.16825216278012	1.50276077894361	1.18183451651525e-05
ITGA5	4.35092911711529	1.48827502929235	1.24421249574834	1.78021243990397	1.35561874108156e-05
PEAR1	4.16867258171139	2.0007171220525	1.44403831472407	2.7719963948733	3.06378731789781e-05
OLA1P1	4.15892451060772	1.99872427897821	1.44217502038861	2.77005126763358	3.19749541709809e-05
RNU4-47P	-4.12249	0.416086288209353	0.274240043040545	0.631300219021045	3.74802984004779e-05
IL1B	4.11019656090563	1.39046343184037	1.18821039205516	1.62714328052732	3.95322459410003e-05
CLVS1	4.10688972698793	100.167403283265	11.1148516798086	902.711882223253	4.01022561488936e-05
EGFR-AS1	4.10430051676945	6.93552008047923	2.7506219657595	17.4874771544438	4.05540025108725e-05
EAF2	-4.10199	0.482661734041329	0.340788454573714	0.68359812775697	4.09612023766937e-05
IKZF3	-4.049	0.490546961435199	0.347497083962945	0.6924844336218	5.14362696291799e-05
CENPM	-4.03256	0.505961341410168	0.363335722376982	0.704573933239532	5.51725355749173e-05
UBAC1	-4.01422	0.366241265035893	0.22427167005053	0.598081176213072	5.96424163967073e-05
PDF	3.92149397549006	4.63081830875688	2.15259230016382	9.9621643202412	8.80016491104646e-05
RPL35P1	-3.91145	0.487806627609458	0.34043456486203	0.698975164393633	9.17440221175693e-05
LGALS9	-3.87731	0.642460519031515	0.513704717769964	0.803487887567104	0.000105618987010021
HSD17B10	-3.86249	0.376923451041073	0.229736062873456	0.618410911059132	0.00011223597164385
C4orf36	3.85371842760519	8.32231972160403	2.83280696329914	24.4496029718653	0.000116337380273167
AL136380.1	-3.82396	0.310922702879821	0.170849045993406	0.565838261513174	0.000131323445287998
MIR4664	3.81792148923939	1.62111130206952	1.26503793113307	2.07740952980254	0.00013458073633539
ESM1	3.81343865156787	1.48888887857932	1.21343795473722	1.82686727747629	0.000137046556151612
MSMO1	3.80942011423596	1.8687045686532	1.35466449575636	2.57780193977521	0.000139293102422742
CD6	-3.79726	0.487850352597809	0.336817949108115	0.706607136466506	0.000146302372348164
HNRNPLP1	-3.77588	8.41378850464951e-07	5.91024052372209e-10	0.00119778267427244	0.00015944599281455
RPL37AP1	-3.77289	0.334825379125902	0.189656594190017	0.591110659693081	0.000161369033324677
SYT16	3.7440457774749	20.0033320164637	4.16860312960564	95.9873797817578	0.000181080639176615
PGK1	3.68639210592284	1.87268594242264	1.34153509940683	2.61413409198016	0.000227455809673811
TRBC2	-3.66995	0.745395673182089	0.63713895603796	0.872046363408169	0.000242596336506161
PTPRB	3.66119166925535	2.2092227066899	1.44529350800181	3.37693689256379	0.000251044856215928
SMYD2	3.64321585889874	2.10232225254714	1.4095961381926	3.13547883241362	0.000269252852602147
RAD9B	-3.64249	0.181328632248242	0.0723534401496064	0.454436897610281	0.000270014945093059
FTH1	3.64240794642474	1.49162745872418	1.20285831504363	1.84972115817252	0.000270099579924504
OPN3	3.62699557152106	2.80077866863176	1.60537788653112	4.88630198315035	0.000286738209838209
AC092614.1	3.60614136924782	7.5305733213648	2.51342333298693	22.5626673406657	0.000310783869956882
MCM5	-3.5945	0.513033591002452	0.35653136862732	0.738233683364887	0.000325014710830877
PLOD2	3.59243007054098	1.49579968276425	1.2007862209418	1.86329310907879	0.000327608585006445
BIN2	-3.58647	0.549312366938712	0.395943866459625	0.76208801810693	0.000335187318069932
MAP4K1	-3.56609	0.489760018052605	0.330822103248341	0.725056980557392	0.000362349571084664
SLC22A3	3.5605243456377	1.42217504286835	1.17153938591103	1.7264309479316	0.000370114992466936
AL021807.1	-3.52466	0.63292970617467	0.490789182549028	0.816236435525625	0.000424020735717373
TLL1	3.51488486299264	1.92855537687295	1.33715415615421	2.78152359961451	0.000439944683513647
SHC1	3.51382793679644	1.85692104165386	1.31481371189198	2.62254319661381	0.000441698823819227
TRAV8-3	-3.51049	0.319056226834227	0.168603969522869	0.603763222003419	0.000447289874613847
S1PR4	-3.50986	0.54231486371635	0.385348216303103	0.763219859246341	0.000448334428960398
RBM38	-3.50024	0.591186579415552	0.440454828050914	0.793501511216627	0.000464842451150825
B9D2	-3.49671	0.474483139788281	0.312418947152465	0.720616505481905	0.000471026684064871
MIR200B	3.48423082263512	1.51242320017183	1.19840260097751	1.90872744647934	0.000493553639515856
TMC8	-3.48131	0.575584669606452	0.421746477597893	0.78553759067038	0.000498976158858173
NMRAL1	-3.47035	0.410141843661116	0.247929960250526	0.678483277098748	0.000519787969751769
RNASEH2A	-3.46146	0.0181481070199029	0.00187472928077777	0.175680719228543	0.000537254971421841
P2RY10	-3.45447	0.429188218922713	0.265596978355703	0.693541501874152	0.000551372088147925
CD52	-3.44103	0.710243522804823	0.584481771057583	0.863065174425272	0.000579496913167919
RPL41P5	-3.42742	0.656274669630257	0.515806078515218	0.834996832992143	0.000609341291178741
APOBEC3H	-3.416	0.428214949638879	0.263223074651365	0.696626020864986	0.000635489074172065
TNFRSF13C	-3.40697	0.391112846946242	0.227908868892039	0.671186074460563	0.000656887803614281
SNAI3	-3.40116	0.300559773811808	0.150342393711489	0.600869624353349	0.000671007090547839
WNT3A	-3.39941	0.539643255986026	0.378137901050832	0.770128683006714	0.00067531415216305
GLTP	-3.3958	0.642572720488998	0.497805939150529	0.829439081866354	0.000684294434472267
EREG	3.38779508697194	1.38421465437003	1.14686437062946	1.67068596639819	0.000704568813445052
PPIAP2	-3.38468	0.077267497059117	0.0175416436852849	0.340348157156385	0.000712609600919092
ADGRG5	-3.38464	0.499982005592549	0.334676959700304	0.746935212212402	0.000712728998854808
CHAF1B	-3.38213	0.465155618189725	0.298517335348324	0.724814687498784	0.000719260113753512
ANKRD34B	-3.37389	0.481426716811556	0.314851158169159	0.736130954726966	0.000741138358758806
EPHB6	-3.36793	0.695632874959714	0.56318784065008	0.859225043222085	0.000757354408042467
L1TD1	3.36273769419685	3.22509874782906	1.62982089336205	6.38184353606642	0.000771736554181991
AGPAT4	3.36035175830767	2.02137078951877	1.34083220746908	3.04731632038602	0.00077843292928029
CXCL2	3.35845983885581	1.25776848921749	1.10020780016464	1.43789343452365	0.00078378109527426
DEF6	-3.35834	0.569421250721165	0.409922809207867	0.790979553929719	0.000784121003097021
ASF1B	-3.3406	0.576496751675617	0.417305200777692	0.796415918309124	0.00083598685038202
MEI1	-3.33877	0.726992580715463	0.602897800605311	0.876629856477658	0.000841499674097336
UCP2	-3.33814	0.668496302985338	0.527724575356232	0.846819208302742	0.000843400565114171
MTMR11	3.32895039426833	1.53892134863485	1.1939613140449	1.98354744783216	0.000871739293123596
ZBTB32	-3.32431	0.203654653280471	0.0796945511050911	0.520427271722713	0.000886377042291415
NUS1P1	3.32213842313294	2.29092281601042	1.40480121259243	3.73599289484652	0.000893303656180104
CD3E	-3.31655	0.708364717748218	0.577782146861257	0.868459809768068	0.000911354188659373
LIPG	3.31488430091013	1.59443893152369	1.21007869096926	2.10088445101211	0.000916810625391918
NDUFA6	-3.31165	0.474732371043677	0.305462864608034	0.737801056131467	0.000927486482919243
NDUFB7	-3.29142	0.463230851834341	0.292946012290853	0.732499549705833	0.000996833352281995
AC026403.1	-3.28696	0.651929723423104	0.50513957315611	0.841376100524157	0.00101276893458536
MAFK	3.28300367067494	1.50955838453676	1.18052700897796	1.93029596018992	0.00102707328310164
CHAF1A	-3.28004	0.491474179109735	0.321484001035998	0.751349578682581	0.00103791306859958
USP30-AS1	-3.2783	0.362298684794515	0.197446908699411	0.664788007411468	0.00104434945177994
ARRDC5	-3.27734	0.0483533600135467	0.0079007604283373	0.295926885241816	0.00104788367780773
TXNDC12	3.27643356846643	2.52679514932637	1.45128419249273	4.39934077673161	0.00105127040634264
APOO	-3.27507	0.431921907126821	0.261344771554254	0.713833044168408	0.00105635018129548
C1orf74	3.27235221985948	1.52218806735141	1.18353076451856	1.95774928869682	0.00106656613682114
RPS4XP13	-3.26831	0.0367636927522369	0.00507129318846547	0.26651369868636	0.00108192497043245
TRBV20-1	-3.26431	0.579627879958167	0.417771394526284	0.80419215778466	0.00109732309773358
MOCS1	3.25572490821558	1.51585969742019	1.18005244347532	1.94722754481621	0.00113103277677968
CST7	-3.23243	0.720712780252089	0.590904476113777	0.879037023098607	0.00122741325293344
PKD2L1	-3.23232	0.0521370175818152	0.00869500917159838	0.312624006332913	0.00122787991349569
TBC1D10C	-3.23166	0.582810549418919	0.420070680929125	0.808597581156329	0.00123074841243481
ERG	3.22188653892494	1.85869872025511	1.2748	2.71004428837856	0.00127349554711577
TECRP1	-3.2192	0.51722197733408	0.346220953343341	0.77268163943874	0.00128548223361587
KLRB1	-3.21561	0.560827503864396	0.394218521079308	0.797850613993586	0.0013016625603282
FKBP1C	-3.21541	0.133264525584027	0.039010549129015	0.455246956929575	0.00130256438420241
ZNF101	-3.20267	0.307962624764288	0.14978551657354	0.633178563730798	0.00136160698581189
PCBP1	3.19952955724442	1.8731757943479	1.27527164436495	2.75140404166844	0.00137652071908345
CHD4	-3.19466	0.375034700905592	0.205474965753009	0.684516609446311	0.00139995843144486
LINC00629	3.19347693654327	28.3633403993928	3.64034307790478	220.989907103714	0.00140570565971945
CD3D	-3.19284	0.753700995223447	0.633601459474294	0.896565469833583	0.00140882525310274
TCAM1P	-3.19213	0.701144808125363	0.563811525952439	0.871929748386559	0.00141226097462684
NUDT3	3.19088976315511	10.8169292734831	2.50563954353598	46.6970435589536	0.00141835386264278
TNKS2-AS1	-3.18061	0.304227044155966	0.146127670553088	0.633378292048056	0.00146966023983362
TIGD7	-3.15978	0.0801914550052157	0.0167639462880563	0.383601172740283	0.00157885740508385
TRAC	-3.15612	0.774653999540354	0.661063446810153	0.90776282049702	0.00159884933834934
DDX49	-3.15595	0.409201022733336	0.234927936650909	0.712752512081285	0.00159977047179799
FOXP3	-3.15127	0.523782910603189	0.350327983323065	0.783119106951128	0.00162560582156251
TFPI	3.15046462764281	1.41632851654729	1.14057014460761	1.75875764964474	0.00163010994556939
ISG20	-3.14923	0.630365469185295	0.473005493145911	0.840076131248268	0.00163701022132958
FNDC4	3.14725069009935	1.46439749104517	1.15476638183973	1.85705095463805	0.00164813589437256
LDHC	-3.14533	0.500210632182448	0.324851335205899	0.770231331786813	0.00165899900127199
SLFN13	-3.13811	0.751139373011285	0.628202261621771	0.898134871770786	0.00170041389443206
RPS10P28	-3.13286	0.0270737731545958	0.0028309135588573	0.258923198319903	0.00173114437284192
TGFBI	3.12830575614277	1.25888319354109	1.08978792008612	1.45421587610823	0.00175817179404673
CD2	-3.12445	0.74134030767452	0.614440282119442	0.894448928197252	0.00178140784858236
SYCE2	-3.11842	0.523958565758357	0.349037389481566	0.786542035050526	0.00181821213221736
CSK	-3.11823	0.455768893154396	0.278130577982677	0.746862446674674	0.00181939455463246
COX7B	-3.11816	0.503689591420047	0.327305637103851	0.775126290979206	0.001819816963536
TIMM17B	-3.11531	0.500289204635048	0.32358580321131	0.773486617121219	0.00183750274584579
PVR	3.10756097815711	1.55545418297173	1.17720286945777	2.05524279467536	0.00188638064913919
NGRN	3.10715379865276	1.77095385726985	1.23492448711945	2.53965128822943	0.00188898095185746
LINC01305	-3.10254	0.665595657016137	0.514668459332228	0.860782452481252	0.00191865590417981
ARHGEF33	-3.10117	0.298760969776743	0.139227238996394	0.641096653969069	0.00192758669057559
AKR1A1	-3.10083	0.522467192997624	0.346617330897465	0.787531215049271	0.00192982290311228
AP000281.1	-3.09831	0.0674446819384099	0.0122504057042632	0.37131710015043	0.00194627000561494
GNG5	3.09679806839685	1.85096304869531	1.2536077592901	2.73296346663935	0.00195623082429756
APOBEC3F	-3.09581	0.549658076566703	0.376309146945259	0.802861167706234	0.00196274995355818
SLC16A3	3.09433290896811	1.49597443120735	1.15911476158979	1.93073160051614	0.00197256010297723
LAGE3	-3.09225	0.578802136386796	0.409273967408116	0.81855172760562	0.00198648641717784
RGS6	3.0916668473841	4.18522624540879	1.68880637125872	10.3718928489139	0.00199036092543138
RPS19P1	-3.09023	0.209202477232678	0.0775603297064113	0.564279144324879	0.0020000081974515
AC004980.1	3.08907388071645	2.90570008892736	1.4768152540592	5.71709493356438	0.00200781502371811
ECI1	-3.08624	0.547845605749992	0.373842974802013	0.802836559650549	0.00202703037721571
CXCL3	3.08366878385455	1.26843541228294	1.09051469453526	1.47538442461709	0.00204465091498077
C19orf57	-3.07919	0.665261520636974	0.513243600716629	0.862305716471216	0.00207566222470603
SELL	-3.07636	0.66174846335233	0.508692862665883	0.860855460904702	0.00209542681023921
APOBEC3B	-3.07574	0.766698607388028	0.64729696862929	0.908125301151214	0.00209983821461174
TIGIT	-3.06421	0.577446459474084	0.406412651886722	0.820457758908781	0.00218245458200299
PSTPIP1	-3.06404	0.558070774556249	0.384286324453682	0.810445154030845	0.0021836899611811
LINC01281	-3.06385	0.00730690370535389	0.000314159952644009	0.169947955842145	0.00218507558722523
LIF	3.06160106604115	1.32480973926445	1.10650593314711	1.58618295001641	0.00220156655109928
ADH1B	3.06065889807489	2.20424628729778	1.32875689761991	3.65657683792199	0.00220850538781487
LINC01089	-3.06012	0.517181357678134	0.339027443454098	0.788952522558878	0.00221251682243744
AIDA	3.05855985028688	2.47739804490609	1.38521850832713	4.43070969382044	0.00222403648847247
PPP1R14A	3.05608334411016	1.47294633329364	1.14900857748071	1.88821123121651	0.00224248912298418
LINC00426	-3.05544	0.15045242163959	0.0446403874627525	0.50707291006612	0.00224730275388529
ANKRD22	-3.05528	0.706474848522569	0.565317100304924	0.882879204124156	0.00224851123301597
PFKFB4	3.05480179167765	1.59210402391335	1.18137113545989	2.14563835773279	0.00225209304957629
FADD	3.05201083751406	1.49955305882177	1.15600922596131	1.9451915484081	0.00227313893550506
GOT1	-3.04952	0.522502897589481	0.344271223460495	0.79300638387725	0.00229208976221575
DNM3OS	3.0480143546475	1.64886186432314	1.19544147418546	2.27426060273812	0.0023035892317951
LAG3	-3.04107	0.7043764625189	0.56197272342326	0.882865271339793	0.00235741360513723
HLF	-3.03925	0.55014239590972	0.374206608338057	0.8087955932191	0.00237170684349214
TARDBP	-3.03855	0.217134747872743	0.0810770943042472	0.581514410923946	0.0023771914071087
CX3CL1	-3.03566	0.788365425003769	0.676160911919015	0.919189548501753	0.00240009844145124
TRAV12-1	-3.03428	0.369051887070247	0.193843580938799	0.70262473841273	0.00241113098937615
PAPPA	3.03189551266006	2.02732196507155	1.28384626702019	3.2013446279678	0.00243023311011907
DDX39A	-3.03165	0.471932998121264	0.290431370194141	0.766861908088116	0.00243223600340981
CLECL1	-3.0303	0.229423841522034	0.0885334105170221	0.594524696962932	0.00244308270202144
CCDC116	-3.0288	0.000781637619412471	7.62856650257842e-06	0.0800880962202132	0.00245524878779006
IL21R-AS1	-3.02155	1.69499549929479e-05	1.36303791171426e-08	0.0210779884986198	0.00251487849649296
POT1-AS1	3.01791288061359	217.765530658458	6.60080991926399	7184.24358873939	0.00254522063122824
HMCES	-3.01654	0.505361522759752	0.32435542787977	0.787377816845791	0.00255674111930851
WAS	-3.01568	0.642242785150317	0.481635101603968	0.856407254587521	0.00256406667954972
LILRA4	-3.01557	0.127166706598718	0.033286148525731	0.485828850239717	0.0025649272947167
PCDH10	3.01474777535207	2.83463541600911	1.43985015605629	5.58055	0.00257193039801864
CXCR6	-3.01128	0.625321300148285	0.460672101175525	0.848817906318475	0.00260152547237736
RPS10P16	-3.01013	0.0599739798523292	0.00959991068400503	0.374678304593038	0.00261134451497481
SLA2	-3.00759	0.594732925764907	0.423890673129135	0.83443037417606	0.00263327116537312
IER5L	3.00659674377921	1.55877384690088	1.16710555692411	2.08188187552274	0.00264189972888199
PAEP	3.00459742687943	1.23855359145501	1.07722013964014	1.42404968349234	0.00265932573886686
CD7	-3.00356	0.719601803294775	0.580548118677943	0.891961817883962	0.00266840837099771
ANKRD19P	-3.00276	0.237468079499537	0.0929073547040126	0.606960438824795	0.00267541270794249
INSL3	-3.0012	0.248000069275896	0.0997684164414047	0.616467982099038	0.00268913545261435
ANGPTL6	-2.99892	0.0345591734264833	0.00383205879335145	0.311669661747857	0.00270937321662164
PCED1B-AS1	-2.99804	0.523297536901417	0.342674067633971	0.799127620067222	0.00271719752790677
CRLS1	2.99628587811648	4.38986034795916	1.66802929624498	11.5530787846269	0.00273290092845629
OPRD1	2.99608970872942	3.82044546577457	1.58968164120848	9.18158905443591	0.00273465970165382
VMA21	-2.99535	0.449845808267352	0.266717142580246	0.758711079678068	0.00274129852753283
PCDHGB3	2.99317686543421	18.9917761705408	2.76278613060379	130.552111188243	0.00276089700428376
APEX2	-2.99095	0.472143797666739	0.288732678314084	0.772062819410687	0.0027810893307007
KEAP1	-2.9905	0.476144407186521	0.292772112260056	0.774368483203153	0.00278520666173928
TSSK5P	2.98980028845107	1.95511936379821	1.25977967074772	3.03425417591472	0.00279159901717703
MRPL40	-2.98756	0.506587289953159	0.324261157575213	0.791432079812273	0.00281217695632211
NAALAD2	2.98383670244627	5.86064681030106	1.83447828963562	18.723133017788	0.00284658648384797
GNG8	-2.98034	0.470764775321979	0.286833367385905	0.772641885090679	0.00287928969243305
ARPC1B	2.98012514295551	5.6263588329872	1.80642128059522	17.5241036283089	0.00288130646965083
LHX2	-2.9749	0.635822105923147	0.471809213399459	0.856850054851024	0.00293086538414188
DLL4	2.97360796442304	1.80165404940008	1.22223104379612	2.65576408830043	0.00294320844815375
SLAMF6	-2.97309	0.597743396918589	0.425780286059434	0.839158552563656	0.00294818746302137
EFNA1	2.97168782402994	1.56405072247734	1.16448400513207	2.10072	0.00296167656226454
DSG2	2.97067633690325	1.55289972827573	1.16154	2.07612816121027	0.00297144761715848
FGD3	-2.96624	0.538195768720977	0.357402332369753	0.810444306696632	0.00301461700294563
DNASE2	-2.96608	0.525275543596549	0.343258195197652	0.803810078130182	0.00301624523848748
MIR4258	2.96485770716179	1.86299810277397	1.23476529514712	2.8108677370349	0.00302822960649502
TRGC2	-2.96324	0.660157453889111	0.501599999955391	0.868835454473908	0.00304423813928017
LINC01301	2.95814088066204	19.0791010817163	2.70460345385945	134.589822240634	0.00309500637848661
SCN2A	2.95456946788271	2.13204850012841	1.29027991288471	3.52298037155134	0.00313105653969882
STAP2	-2.95253	0.646835120192228	0.484388293615643	0.863760908817683	0.00315180505751413
ZIC2	-2.94767	0.748899058957927	0.617909601820138	0.907656716866039	0.00320175129179847
FOXD3-AS1	-2.9472	0.703511543980487	0.556804547464987	0.88887293533631	0.00320662234109795
RFC5	-2.94592	0.494517059258017	0.309539	0.790036231406138	0.00321996100298955
MIR200A	2.94531223906932	1.36769341668014	1.11043914621378	1.68454551373504	0.00322628898046679
PTPN7	-2.94136	0.608816826296223	0.437401390470354	0.847409121362929	0.00326774281114415
RPS15P5	-2.9404	0.214939289694559	0.0771368367850021	0.598921347827221	0.00327788235854859
TNF	2.93963861930648	1.43825603520291	1.12875858519724	1.83261545021704	0.00328595249533247
CHIT1	-2.93799	0.59984684462887	0.42654887189851	0.843552194640018	0.00330347393753039
CORO1A	-2.93736	0.699549527058909	0.551153952207327	0.88789990319122	0.00331022852983113
CD8A	-2.93605	0.744852860508106	0.611886850079694	0.906713036462294	0.00332415566784834
UBASH3A	-2.93311	0.420624025096085	0.235815361895992	0.75026736623743	0.00335589059438378
SLFN12L	-2.93145	0.0283155356740632	0.00261245618545346	0.30690258652892	0.00337387906400471
COMMD4	-2.92955	0.499783362314266	0.314236822564045	0.794889049628308	0.003394526994534
IL17C	2.92766425483185	2.08581150993741	1.27506434489903	3.41207067109376	0.00341518615257891
LINC00158	-2.92683	2.69838486676645e-06	5.03344297001482e-10	0.0144658058759583	0.00342439550947067
MAP7	2.92112017952828	1.64794179815991	1.17864188452386	2.30410288806222	0.00348775259493868
RPS4XP14	-2.92024	0.105293163583565	0.0232417847914553	0.477013723210764	0.00349759625881852
MIR100HG	2.91970937142027	2.36948140060561	1.32786302555816	4.2281786598101	0.00350357957348412
PCDHB5	2.91547863135165	1.99223798559416	1.25344605192959	3.16648026864362	0.00355143426146061
WDR45	-2.91505	0.459962274278432	0.272866133289705	0.775344639544427	0.00355636997455931
AK4	2.91427321119034	1.59425642906451	1.16501037357275	2.1816574506706	0.00356517742838652
SH2D1A	-2.90577	0.527130442557259	0.342255161901632	0.811869430768362	0.00366345757857645
ZNF281	2.90395643833968	1.93301076883314	1.2389292430957	3.01593545656284	0.00368479425158882
APOBEC3G	-2.90316	0.678338891364894	0.521980021982724	0.881534986320574	0.00369422474507775
RNF6	2.90314366665092	2.06571760431836	1.26578790493143	3.37117237743076	0.00369437118696485
TRBV6-5	-2.90312	0.51336283393237	0.327284236715627	0.805237068267551	0.00369467029685613
SLC15A3	-2.90103	0.661444039547678	0.500283788652384	0.874520077157941	0.00371940558418952
SPP1	2.89397118396107	1.21065578356765	1.06363909955345	1.37799318105279	0.00380403070659614
FAHD2A	-2.89291	0.390193558949105	0.206238682886025	0.738227239016592	0.00381687705868559
KLRK1	-2.89263	0.079096701461825	0.0141769410540579	0.441300288848301	0.00382027403408461
ATF5	-2.89184	0.597092709600762	0.420971309142848	0.846897867183159	0.00382994677066122
CXCL1	2.88957883134036	1.18872418809154	1.05719368419853	1.33661902873092	0.00385758272484653
DAAM2	2.88562834309743	2.10252673980635	1.26920105727066	3.48299323127492	0.00390633152752768
PLA2G2D	-2.87938	0.622573490383274	0.450918940119401	0.859573010673223	0.00398453943289329
HNRNPA3P5	-2.87665	0.226782746884068	0.0825209085308802	0.623241008853381	0.0040192267553024
LCK	-2.87308	0.674536143500561	0.515650803077834	0.882378164007108	0.0040648921280116
CD5	-2.87267	0.622130982719912	0.450040344489885	0.860027249554163	0.00407023509125755
SNRNP25	-2.87262	0.52036840547877	0.333236469766537	0.812585962185432	0.00407079037234314
DHCR7	2.87023476262386	1.50080491203328	1.13741708712623	1.98028973669995	0.00410167147990398
RPA2	-2.86926	0.58443207471844	0.404941445315041	0.843482073547619	0.00411435226750953
FOXRED2	-2.8688	0.704835431074271	0.555010666664307	0.895105292090061	0.00412030160745326
PPIAP13	-2.86478	0.0481794493254538	0.0060496345145174	0.38370240908498	0.0041730423435478
RPL12P38	-2.86171	0.00362324168390181	7.71507265093007e-05	0.170158868152473	0.00421364772791276
SHF	2.86149702728624	1.64633154622747	1.1700789542801	2.3164313401153	0.00421645457869414
SIRPG	-2.86021	0.637611092261511	0.468411319078977	0.867929292943432	0.00423361725517436
RHOH	-2.85948	0.458237877716357	0.268406751085873	0.782327388280968	0.00424340400642732
AL353662.1	-2.85944	0.109137185435184	0.0239091241936158	0.498174887053962	0.00424393630058177
CRTAM	-2.85902	0.437282441605407	0.248022445759835	0.770962213321388	0.00424954180974008
CD3G	-2.8586	0.561431660839681	0.377924928405904	0.834042652657888	0.00425511824617336
BDH1	-2.85606	0.638051071497887	0.468746457736235	0.868506125477076	0.00428933551722217
TSC22D3	-2.85487	0.719903664253708	0.574497873247172	0.902111756961958	0.00430545968503706
LDHA	2.85447469996603	1.65929333778671	1.17197306385805	2.34924715057856	0.00431080651049533
TFRC	2.85409680249637	1.35237552829102	1.09918356510381	1.6638891151431	0.00431593780531892
HOXA1	2.85400563213967	1.76643838903902	1.19510403990243	2.61091	0.00431717659431003
PRSS36	-2.85234	0.523324196770262	0.335371845079615	0.816610633669102	0.00433980409289371
TP73	-2.85071	0.662944935368844	0.499731710733845	0.879463876098259	0.00436216834656334
HSPA5	2.85019376445987	1.91872418470119	1.22573380978591	3.0035089736166	0.00436926024925843
FAM32A	-2.84983	0.388496485789982	0.202763069246229	0.74436395164191	0.00437428285518866
WWC2-AS2	2.84638552676341	7.17564389703344	1.84727793666355	27.8733721196451	0.00442186244205548
TEX41	2.84581135188432	209.223765752779	5.27670012582047	8295.82563192701	0.00442984297024986
ITGAE	-2.84357	0.469816233786329	0.279126007554322	0.790780104882251	0.00446116549173307
SELPLG	-2.8395	0.690810690354019	0.53515127247178	0.891746753592111	0.00451847364671782
TCP11	-2.83671	0.702755391793178	0.550752846741745	0.89670919290947	0.00455812647330032
IL12RB1	-2.83638	0.555348157479505	0.369877416598463	0.833821050368943	0.00456278424449355
MMP3	2.83323950578893	1.18066198301809	1.05252134896734	1.32440327173587	0.00460788470444277
TRDV1	-2.83315	0.534585497646508	0.346625496103552	0.824468071467511	0.00460913845500936
GNGT2	-2.83189	0.490810718916009	0.299912350555588	0.803218544873497	0.00462735438372773
CCL5	-2.83173	0.812316464142065	0.703464526080597	0.93801181644896	0.00462966690276993
IGSF6	-2.82815	0.628864577588122	0.455987979966649	0.867283073939825	0.00468173892693596
AC119403.1	-2.82535	0.0373471390339268	0.00381787877668135	0.365336061097225	0.00472292792735653
HEIH	-2.82134	0.461310641042979	0.269508143622971	0.789614386707332	0.00478240925619113
SOX21-AS1	-2.81741	0.675387081791855	0.514018831486382	0.887414394784489	0.00484130764260026
MPEG1	-2.81617	0.67775654449146	0.517018725670696	0.888466724305029	0.00486005758040246
AC012368.1	-2.81561	0.0492187635742054	0.00604943651630073	0.400448319648604	0.00486845670121739
TCL1A	-2.81476	0.184929754355896	0.0570968059686148	0.598965449397131	0.00488134006295859
TRBV2	-2.8146	0.423716889481756	0.233017245778119	0.770483754679044	0.00488373845149115
LRCH1	2.81412355644129	2.08168909261512	1.24924	3.46883984963656	0.00489104253028951
HNRNPA1P12	-2.81233	0.100971271788456	0.0204270677485367	0.499102360264535	0.00491834758395963
CCL17	-2.81215	0.642722256361642	0.472305457267224	0.874628680373004	0.00492108439403748
CDKN2D	-2.81188	0.617350773813136	0.441089139800179	0.864047521324901	0.00492534764104292
RENBP	-2.81162	0.694836056606078	0.539087609280001	0.895581974523032	0.00492930856576872
SERPINA3	2.81153276546689	1.7677832280788	1.18834441992552	2.62975740793445	0.00493060686020128
RPS4XP11	-2.80662	0.190009666298182	0.0595824347397434	0.605944913873487	0.00500646960046954
CCDC144A	2.80631663862324	39.3760607578655	3.02763564000898	512.107249735809	0.00501114234473578
TRGC1	-2.80601	0.311098763166022	0.137623785940143	0.703239195043813	0.00501596041853181
TMPO-AS1	-2.80182	0.530969419501258	0.34099410336475	0.826784163314206	0.0050814856333822
CD48	-2.79915	0.580086661225768	0.396178224034041	0.849366558074998	0.00512375007985952
AC145124.1	2.79854785030347	6.40486396470099	1.74449772351381	23.5152398615329	0.0051332962939225
ITM2A	-2.79676	0.681095847674341	0.52038020882831	0.891447341480816	0.00516182978668356
LINC01337	-2.79595	0.180742161538171	0.054482576424208	0.599599561943169	0.00517471635417887
OR2B6	-2.7949	0.531718635272837	0.341438547844565	0.828039800664555	0.00519152785873524
SIT1	-2.79397	0.653931372151309	0.485432114521411	0.880918725176007	0.00520648989496578
DDIT4	2.78954470341292	1.34123748773267	1.09123635106869	1.64851363019358	0.00527822091997043
RPL15P20	-2.78704	0.0128559996044256	0.000601659812997927	0.274701288433169	0.00531913590861289
CCL19	-2.78596	0.819439151633088	0.712318873029023	0.942668443380968	0.0053369364991312
AC023283.1	-2.78387	0.00807219759778893	0.000271282735941056	0.240193589288731	0.00537151829772583
HLA-DPB1	-2.78179	0.792694920588571	0.673006519392426	0.93366887098537	0.00540602474568069
RPS4XP2	-2.77982	0.000427950802793804	1.8042595934994e-06	0.101505287970593	0.00543882857371793
FCRL3	-2.77953	0.237953526073088	0.0864628982484286	0.654869102443543	0.00544382985590284
HSPB11	-2.77632	0.484479896771736	0.290465057826813	0.808086081444955	0.00549779030635336
BCL2	-2.77605	0.502427167132451	0.309045706597811	0.816814642247252	0.00550241731660266
AC019117.1	2.77523752402054	1.98532297475739	1.22318741779077	3.22232493301671	0.00551614050455417
LIMD2	-2.76725	0.637429461284069	0.463358379607543	0.876894291751112	0.00565313388735445
PYHIN1	-2.76442	0.446888964719308	0.252459812704285	0.791055592764072	0.00570243850029782
POMZP3	-2.76339	0.56224405131857	0.373728481158932	0.845850367793313	0.00572049318529782
LY86	-2.76304	0.662509483408429	0.494714640652834	0.887216143486066	0.00572651779674917
DENND2D	-2.76281	0.522684334231276	0.329879651373211	0.828177525086891	0.00573069317066977
LY9	-2.76113	0.215868934153058	0.0727060421893607	0.640928804940454	0.0057602095104729
CXCR3	-2.75897	0.679352864540129	0.516198275213095	0.894075661853685	0.00579836409228893
EBF2	2.75746132139277	2.83190810284618	1.35128753806501	5.93486084719597	0.00582521044097567
TMEM255B	2.7567049689658	2.21961451584226	1.2591599523291	3.91267891726119	0.00583870062768623
FAM27E3	-2.75595	0.142590299001795	0.0356862237206316	0.569743482207297	0.00585210779742638
COA3	-2.75408	0.528934887127148	0.336170119412658	0.832233737219162	0.00588573392270613
TRG-AS1	-2.75049	0.255287651651051	0.096490983093785	0.675418396578719	0.00595063318863291
AL360178.1	-2.74809	0.000489850819917286	2.13495549320525e-06	0.112392893686692	0.00599429121086627
LINC01213	2.74628438871331	3.64418207177308	1.4480988277666	9.17068829667807	0.0060274490241829
ASS1P1	-2.74533	0.22836559887475	0.0795684024135178	0.65542156393181	0.00604494781670646
RBM8B	-2.7453	0.338968379502313	0.156575250737649	0.733829655460334	0.00604564693794769
TBX21	-2.74503	0.462313153475814	0.266500961657106	0.801998801609397	0.00605062510450682
IGHM	-2.74314	0.88091970585815	0.804625085901284	0.964448588251468	0.0060854120469219
IL12A	-2.74263	0.482900089353627	0.287033370015293	0.812422946799935	0.0060949370616929
HSPB1P1	-2.74209	0.788509765969672	0.665346308336878	0.934472233841184	0.00610503531905814
CCDC34	-2.7413	0.643821795777036	0.4699350029084	0.882050713720431	0.00611962631856325
AL590764.1	-2.73724	0.307735375522948	0.132340955447793	0.715583932636851	0.0061956323948489
SDS	-2.73556	0.649595570672136	0.476877043829247	0.884870452241674	0.00622735469820919
NDUFA12	-2.73523	0.461006952433474	0.264686878772843	0.80293897142666	0.00623374748470895
SAMD1	-2.73509	0.493055998810112	0.297047327296646	0.818402307050086	0.00623637357667978
ALG1L	-2.73377	0.767834927869877	0.635347282019554	0.927949946654204	0.00626137861966962
CLNK	-2.73374	0.0868876729398774	0.0150744066211278	0.500813590786786	0.00626197893655087
WWC2	2.73327339452816	1.71510630358361	1.16489458088502	2.52519814312931	0.00627082569721366
ATF4P3	-2.73234	0.0841543582580705	0.0142564641081147	0.496754031022089	0.00628862163804462
ASGR2	-2.73165	0.12505940216717	0.0281380867148806	0.555825071863855	0.00630189146806201
RPL35P5	-2.731	0.608401918836251	0.425902593185115	0.869102233154866	0.00631416968796151
OVCH1-AS1	-2.73083	0.00410299794695711	7.94297066461829e-05	0.211943274922611	0.0063174990770027
AC106795.1	-2.7295	0.643612974223122	0.46903438551745	0.883171198911859	0.00634299802135957
ICOS	-2.72853	0.552815137944806	0.361134619278511	0.846234507651147	0.00636179333428979
TTC24	-2.72799	0.122557789595152	0.0271235335503485	0.553777838811733	0.00637215097180972
TRAV4	-2.72798	0.485769753110452	0.28916195603434	0.81605566746466	0.00637232667015749
TREM1	2.72752086337937	1.40948926262894	1.10140681450559	1.80374767551993	0.00638122220969547
SOGA3	2.72220729840189	1590450.50284901	54.5108824947937	46404179977.3515	0.00648474505702537
GZMH	-2.72191	0.772378023178435	0.641297496633062	0.930251269997348	0.00649065940137611
SOX21	-2.72049	0.791285408180701	0.66847897805105	0.936652636445186	0.00651853384958772
VGLL3	2.71891429539297	1.51932850325255	1.12384328597138	2.0539866453003	0.00654965762205711
LINC00862	2.71605813611321	4.78495755115158	1.54619382233508	14.8078581323944	0.00660643160893134
GZMM	-2.71526	0.686533224076638	0.523309376304281	0.900667729459918	0.00662236816935375
RIMS4	2.71501310278094	1.67499899264125	1.15424705282998	2.43069420750989	0.0066273148327379
MYO1G	-2.7142	0.565041962082936	0.374157683905964	0.853309801315682	0.00664355524112029
ARMC7	-2.71392	0.489373160014529	0.292079656701655	0.81993416606631	0.00664928817732392
SLC52A1	-2.71216	0.711487340346897	0.556332736939189	0.90991272284096	0.00668462969966066
RPL41P2	-2.71213	0.547362558490241	0.354107759023421	0.846086432173225	0.00668522608277264
NAP1L1P3	-2.71149	0.0595525345118663	0.00775092384640818	0.457558922918652	0.0066981526912436
NDUFB4	-2.71141	0.51851723785442	0.322535758251207	0.833582382957908	0.00669968490268762
PARL	-2.71111	0.585429327743499	0.397532667598017	0.862136688924315	0.00670588760474081
STAC3	-2.71081	0.530067270865781	0.334978921826791	0.838773108799905	0.00671187912861933
MCAM	2.7095050534424	1.35761267503621	1.08825411105154	1.69364136252887	0.00673836786401428
ROR1	2.70928319764624	2.00558857700939	1.21225072107619	3.31811354722034	0.00674287574863086
CXCR2P1	-2.70566	0.647514393631818	0.472628394974604	0.887113204408528	0.00681680941906167
TRBV5-1	-2.70553	0.466693775934417	0.268701007106506	0.810577834602581	0.00681953813083311
SP9	-2.70214	0.576403251615257	0.386520211020174	0.859568785797079	0.00688949721394659
DMBT1	2.70116594347329	1.20399429590839	1.0522608289914	1.37760736182624	0.00690968537907479
STAP1	-2.69825	0.322560443514432	0.141799571230396	0.73374862009402	0.00697042168158394
FTLP2	-2.69787	0.39084456402408	0.19751542266163	0.773405292450859	0.00697844152407184
EFCAB1	-2.69697	0.285029032392562	0.114483191274067	0.709637357261924	0.00699734900078211
HNRNPA1P21	-2.6945	0.60375828439137	0.418277197924395	0.87148921284755	0.00704942535625197
TLR10	-2.6935	0.254506384663385	0.0940256198843336	0.688892026599859	0.00707069132740003
PTGS2	2.6921502163844	1.22727736541665	1.05727952885074	1.42460881021812	0.00709929612683112
AIG1	2.69063397696137	1.87282436868001	1.18576723046691	2.95797608991148	0.00713163926935681
GPR171	-2.68922	0.614720491386934	0.431182880639554	0.876382851681169	0.00716181951158591
ARHGAP8	2.68760422122534	3.35195097201568	1.38745449952361	8.09797749955381	0.00719666399201877
HAVCR2	-2.68693	0.701595642690091	0.541771436019892	0.908568472080997	0.00721112157995978
AKNA	-2.68455	0.587457139255324	0.398389656399273	0.866252135111102	0.00726271053560487
LST1	-2.68317	0.692465756919733	0.52943771797876	0.905694491010282	0.0072927097159684
GRB10	2.68277260522855	1.53623145757159	1.12262902243318	2.10221457317881	0.00730146176760009
PLEKHA8P1	2.68127633989425	2.36448039180291	1.26049677998542	4.43536834999701	0.00733419232421669
ARRB2	-2.6812	0.565508017219618	0.372795874725487	0.85784027995254	0.0073357943583698
AC008753.1	-2.67689	0.291798083394781	0.11842046840929	0.71901523965082	0.00743090036423408
M1AP	-2.67594	0.684657381875746	0.51876098807806	0.903606364645169	0.00745206720457977
AL121992.1	-2.67536	0.00789594967583507	0.000227535147705013	0.274006112515629	0.00746482920052141
TEX30	-2.67507	0.562815637706676	0.369372963614235	0.857565315413801	0.00747133711611819
RBX1	-2.67438	0.476792351143427	0.277068771635471	0.820485631661038	0.00748674340081159
ZYG11A	-2.67296	0.593597763510686	0.404952296728634	0.870122993970841	0.00751860261621465
IGFLR1	-2.67202	0.336780702727821	0.151582647687619	0.748246870338239	0.00753966394229269
SPC24	-2.6711	0.600036038999825	0.412488056806141	0.872857388614796	0.00756027246800725
LATS2	2.67097004957284	1.74661216666739	1.16003780931172	2.62978847436068	0.00756323948834837
AC012306.2	2.66837856465998	1.99621625030203	1.20143594737418	3.31676384969095	0.00762183254630613
SNORD101	2.6663815583922	1.58913643770799	1.13056261905685	2.23371494429736	0.00766726178578622
SMCO4	-2.66628	0.616223348606241	0.431693902789184	0.879630712674043	0.00766965852438286
RPSAP4	-2.66597	0.0760708941597624	0.0114476064346741	0.50550138767332	0.00767663023504902
RPL36AP26	-2.66585	0.23503003785982	0.0810523958704455	0.681523576239285	0.00767940638240068
ERICH6B	2.66371090613532	203.613290751996	4.07363216047935	10177.2498197231	0.00772839484354465
FAM91A3P	2.66359628526971	638455.119353988	34.1601405688653	11932765282.6124	0.00773102834226181
CD247	-2.66315	0.662219388358423	0.488953066586493	0.896884687479977	0.00774119677587542
SLAMF1	-2.66198	0.460432049525925	0.260112189286965	0.815023981812559	0.00776829875262801
AC006449.2	2.6616425463788	2.07570179218962	1.21230801255315	3.55399608472875	0.00777604077500508
STARD4-AS1	2.66146846013256	2.56084916132046	1.28127109467221	5.11831450370264	0.00778006294135718
MS4A6A	-2.65999	0.701452367627996	0.540163048708346	0.910901671685044	0.00781427047072909
RAMP3	-2.6597	0.663703198718251	0.490664387520409	0.897766267926906	0.00782096631560319
FCRL2	-2.65941	0.108312290211687	0.021049591805564	0.557329202355346	0.00782769838935944
BLOC1S1	-2.65768	0.536210270330686	0.3386313494773	0.84906921480222	0.00786813800737924
PFKP	2.65668464747979	1.54056814067562	1.12000427547694	2.11905458579975	0.00789132224102944
TSPAN33	-2.65539	0.693844328117561	0.529780870087565	0.908715242174257	0.00792170348714792
ZNF490	-2.65305	0.225948652409061	0.0752972431659978	0.678016768992744	0.00797676779625786
CD1C	-2.64993	0.533253628279079	0.334939334498798	0.848987869693826	0.0080508800221686
NDUFA1	-2.64621	0.580584494571937	0.388121850142932	0.868485902592748	0.00813990516428807
TRBV29-1	-2.64577	0.553338147249904	0.356944330176325	0.857789518748503	0.00815043687151312
TRBV24-1	-2.64475	0.300541827338178	0.123308322770099	0.732516572690533	0.00817508992698282
ZFP36L2	2.64360976247937	1.38053585456682	1.08696803329939	1.75339033656714	0.00820271653643769
APOC1	-2.64245	0.795768869687265	0.671735483038772	0.942704546585335	0.00823097095386818
RPS10P2	-2.64245	0.31256799256756	0.131926765945594	0.740552906587617	0.00823097886293796
SLC12A3	-2.6423	0.00082029881569674	4.2156632094099e-06	0.159616675623304	0.00823452608703603
CH17-340M24.3	-2.63849	0.660708657669451	0.485631463780455	0.89890372201402	0.00832772290547649
KIF22	-2.63593	0.573136529620552	0.378886602667917	0.866975710601724	0.00839069340965034
NDUFB6	-2.63517	0.515449746674567	0.314860937626908	0.843827892241433	0.00840950943759093
RNU5B-2P	-2.63437	0.627500842843159	0.443649278699286	0.887541863977132	0.0084294199006167
RPS4XP3	-2.6326	0.129957054644443	0.0284462467173131	0.593710524263287	0.00847352132228702
CHTF8	2.63086505754112	9.77830235087019	1.7886635494542	53.4562226049777	0.00851678454057014
RPS26P31	-2.63017	0.285748579895559	0.112354585388692	0.726737147663815	0.0085343191183048
BATF	-2.63006	0.783896729679381	0.653821004149885	0.939850630221048	0.00853693098347535
NABP2	-2.62744	0.434386963682895	0.233210268055032	0.809106887922783	0.00860296183818824
CYTIP	-2.62727	0.681042343526036	0.511352869578497	0.907042281893824	0.00860730143178756
PDIA4	2.62594117139172	1.59820722682882	1.12627472380882	2.26788925107888	0.00864097502050527
SMAP1	2.62524763946059	1.82471341842575	1.16463890939723	2.8588938876396	0.0086585967550366
TAF7L	-2.6233	0.754444358754296	0.611220468417847	0.931229106135022	0.00870833974789077
GCKR	2.62204754696395	3.15922926799186	1.33704921540599	7.4647435956243	0.00874032362264386
MYO1B	2.62005275564666	1.42734842011463	1.09378473024553	1.86263663778373	0.00879161652534742
ZNF683	-2.61739	0.743238318366101	0.595149161592901	0.92817604986484	0.00886044159564392
WASH4P	-2.61738	0.216111935105444	0.0686228417260387	0.680595080592502	0.00886072966793397
RPS15AP24	-2.61669	0.0914293267934845	0.0152375428758233	0.54860037907904	0.00887856717157761
TGFA	2.6157452926371	1.38196874655029	1.08448526135585	1.76105446933789	0.00890329454462701
UQCRFS1P1	2.61466656148744	1.84003949757806	1.16496187168675	2.9063143051584	0.00893146006866043
ZNF541	-2.61451	0.744590438197992	0.596898398460469	0.928826282807651	0.00893564678363632
PCDHB12	2.61428752993774	2.30327	1.23222546329407	4.30524430268856	0.00894137540830693
FAM3B	-2.61418	0.816990688977292	0.702105560143231	0.950674405340736	0.00894424976466115
IL1A	2.61254202749386	1.18318109413018	1.04291092689823	1.34231741695396	0.00898716417129008
OSR2	-2.60997	0.679068049422401	0.507794488408506	0.908110320755148	0.00905510016761109
TNFAIP8L2	-2.60957	0.689153026728842	0.521050571129196	0.911489058001172	0.00906555093461646
SLC25A33	-2.60941	0.537540813033448	0.337224753716986	0.856847317676924	0.00906995256127156
TRBV4-2	-2.60935	0.530005765557412	0.328987169466257	0.853851267147699	0.00907150995598279
RPS2P48	-2.60724	0.0723353515532614	0.0100434170403805	0.520978374520995	0.00912741116175222
SLC25A5	-2.60542	0.62935303563219	0.444231753767192	0.891618485397666	0.00917624082088592
P2RY13	-2.60462	0.549939712227505	0.350674053621386	0.862435312683273	0.009197549269117
CORO7	-2.60428	0.380341195821115	0.183744481906065	0.787285820711556	0.00920681763669175
ACYP1	-2.60082	0.551780783762995	0.352503332220433	0.863713915588505	0.00930013105137121
ADI1	-2.60037	0.535232662928936	0.334147355892906	0.857328356528474	0.00931244896874637
HMX2	-2.6002	0.617243199277965	0.429050060190994	0.887983017378666	0.00931680877417887
CHST7	-2.5983	0.629807082407792	0.444369790010559	0.892628099316989	0.00936872505402823
SLC4A11	-2.59783	0.75874213552023	0.616069487091314	0.934455674686692	0.00938160012175302
AC006272.1	-2.59724	0.0365245334328987	0.00300512524112153	0.443922111543366	0.00939765802876907
IL21R	-2.59434	0.514280737983794	0.31118506809412	0.849927276655708	0.00947726167505829
HNRNPUP1	-2.59349	0.280831304917869	0.107553129989168	0.733276863535408	0.0095005958259905
BACE2	2.59253948016284	1.36631989178589	1.07913199015347	1.7299367118422	0.00952702458420287
MSRB3	2.59224784549534	1.37603439566173	1.08096973498371	1.7516407691772	0.00953510511930889
CCL20	2.58955806632138	1.17680341309054	1.04037546731813	1.33112161576766	0.00960992141243446
RNF212	-2.58934	0.79413200023832	0.666987670423931	0.945513180778413	0.00961610068157807
EEF1A1P24	-2.58932	0.0844994461996387	0.0130179883128509	0.548483854528975	0.00961666161993655
GPR174	-2.5875	0.471480601578589	0.266760305151304	0.833309729267348	0.00966750860086983
ELMOD1	2.58514	25.088362187093	2.17992234561961	288.737770175869	0.00973392236497521
AC009065.4	-2.58508	0.449364731099297	0.245022299649549	0.824123607707373	0.00973558225408028
SEC61G	2.58467014338327	1.48955667767264	1.10110138274378	2.01505431813216	0.00974721990784002
GMPSP1	-2.58434	0.474202290830105	0.269286673928449	0.835049909258665	0.0097564221418004
RPL10P15	-2.58321	0.460546601686055	0.255734034102639	0.829389694136082	0.00978855998591547
MFSD2B	-2.58293	0.0904053737064939	0.01459279498619	0.560079930043938	0.0097966241011966
TOMM20L	-2.58229	0.106484819378785	0.019453412786904	0.582880591819131	0.00981481145678163
GPR143	-2.58159	0.710849164472543	0.548587150780479	0.921105304621897	0.00983468296993846
NAA38	-2.57981	0.620747174849193	0.432101095918835	0.891752089320396	0.00988552143165411
YKT6	2.57859043964634	2.15389982914393	1.20210864262777	3.85928884418045	0.00992043274952516
CPLX1	2.57809331730977	1.42972657588373	1.08949138095847	1.87621317388479	0.00993471648385198
CBX7	-2.57793	0.595521754931199	0.401564353366636	0.883161459982818	0.00993954606418314
COMMD9	-2.5759	0.448095304575695	0.243278320852792	0.825348519666423	0.00999792837819756
