# Supplementary material
Source: Research Square preprint supplement (doi:10.21203/rs.3.rs-9543784/v1)

Figure 6C FCRL3


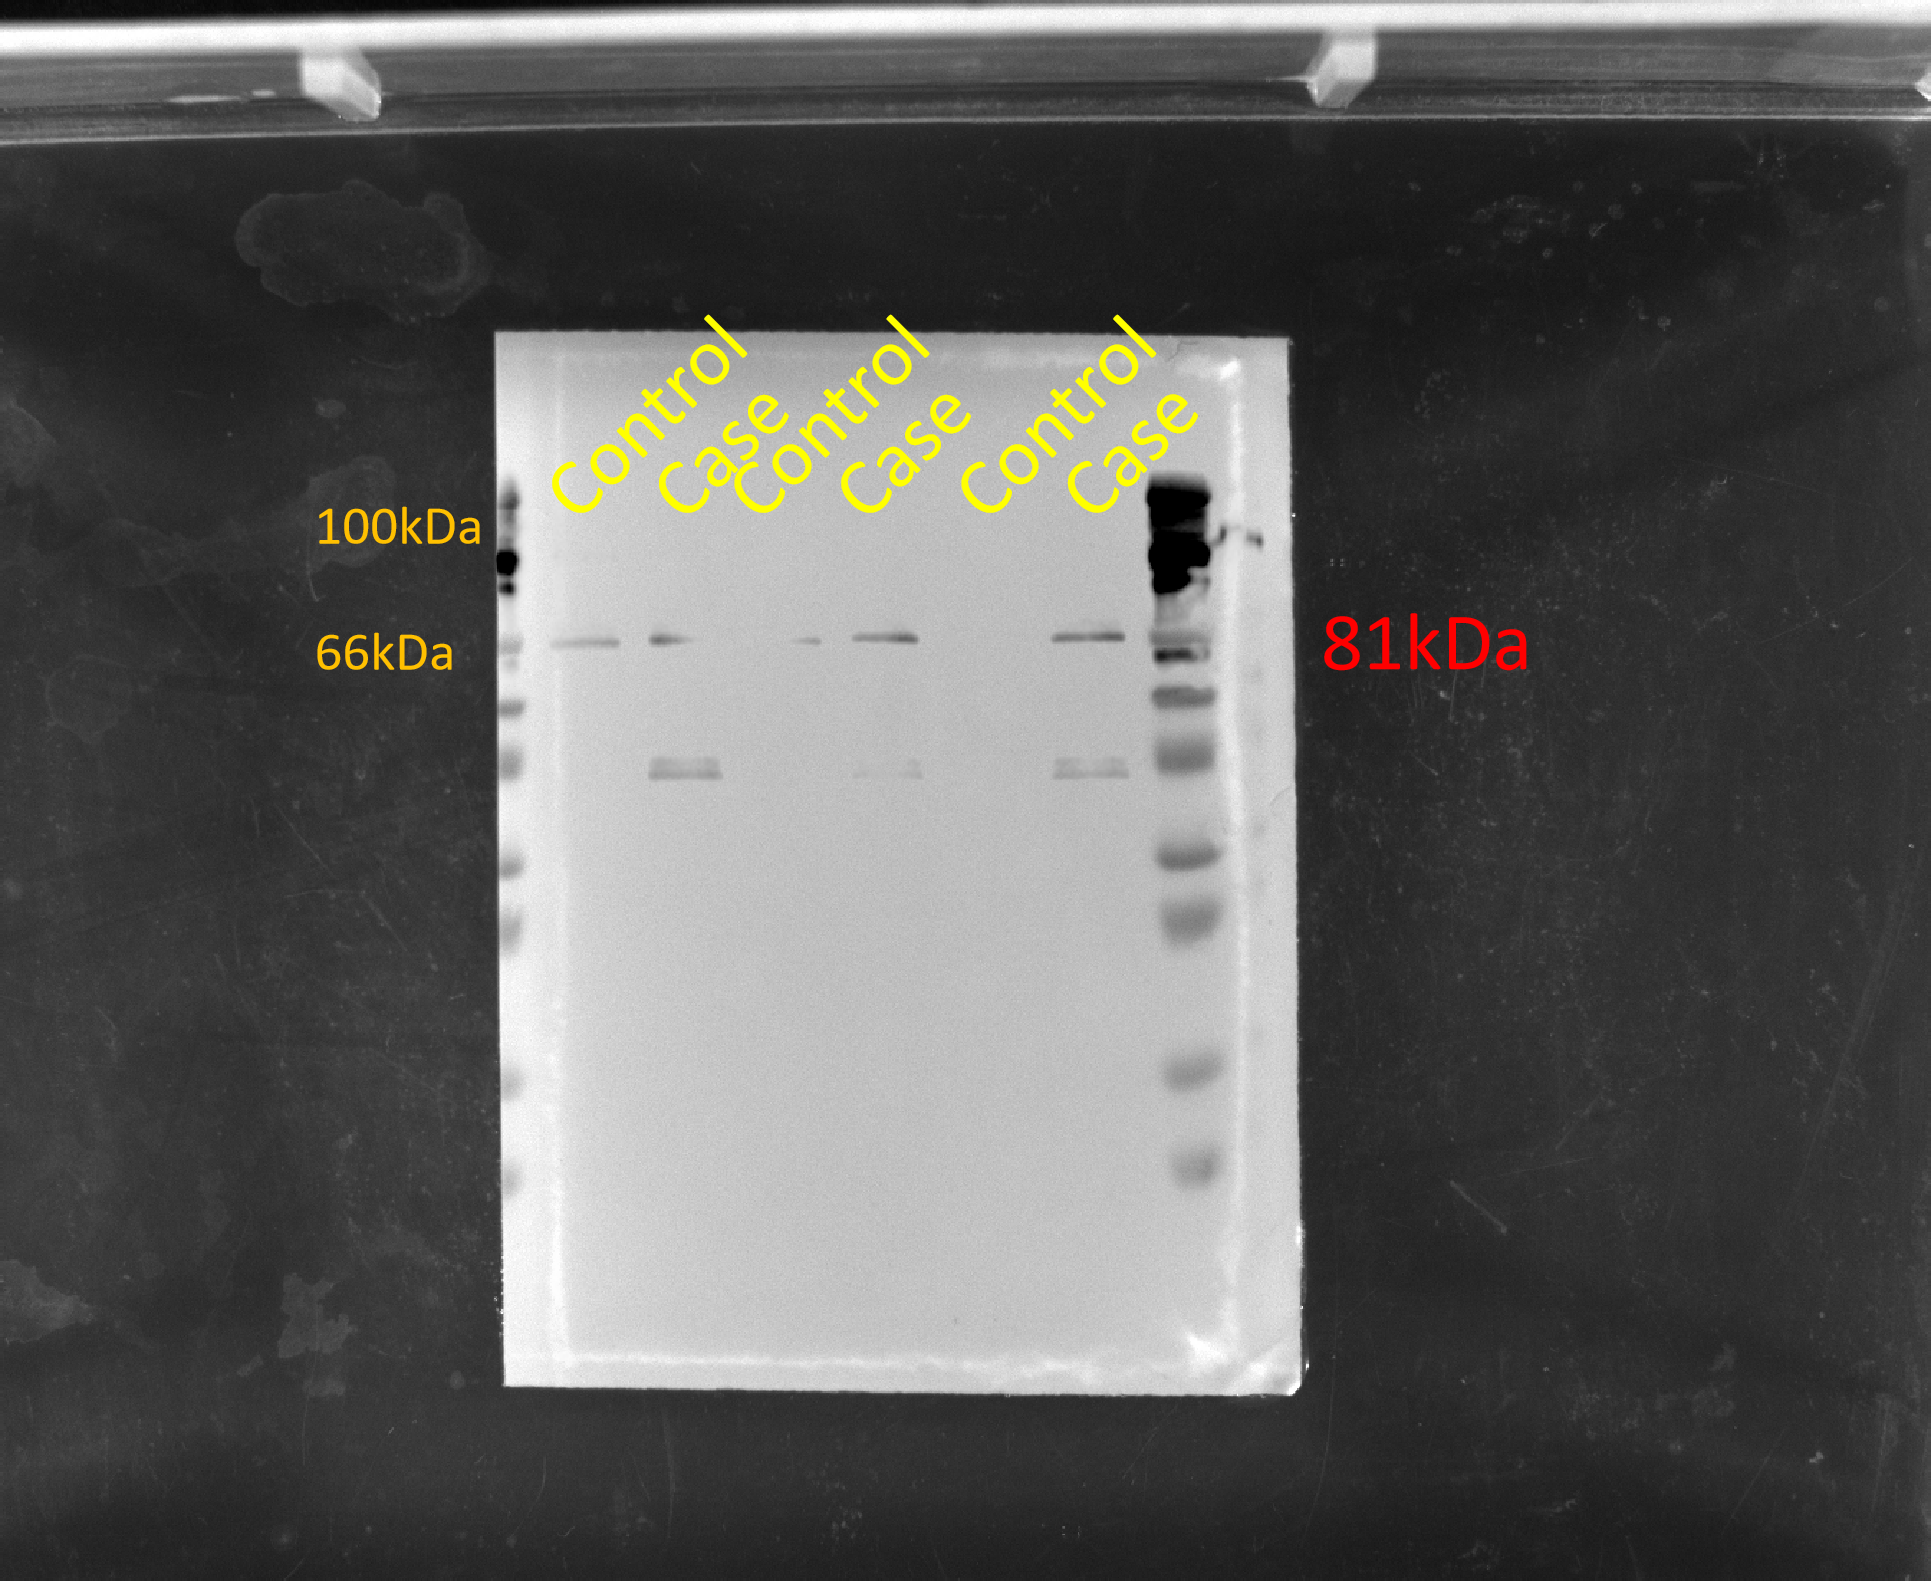


Figure 6C GAPDH


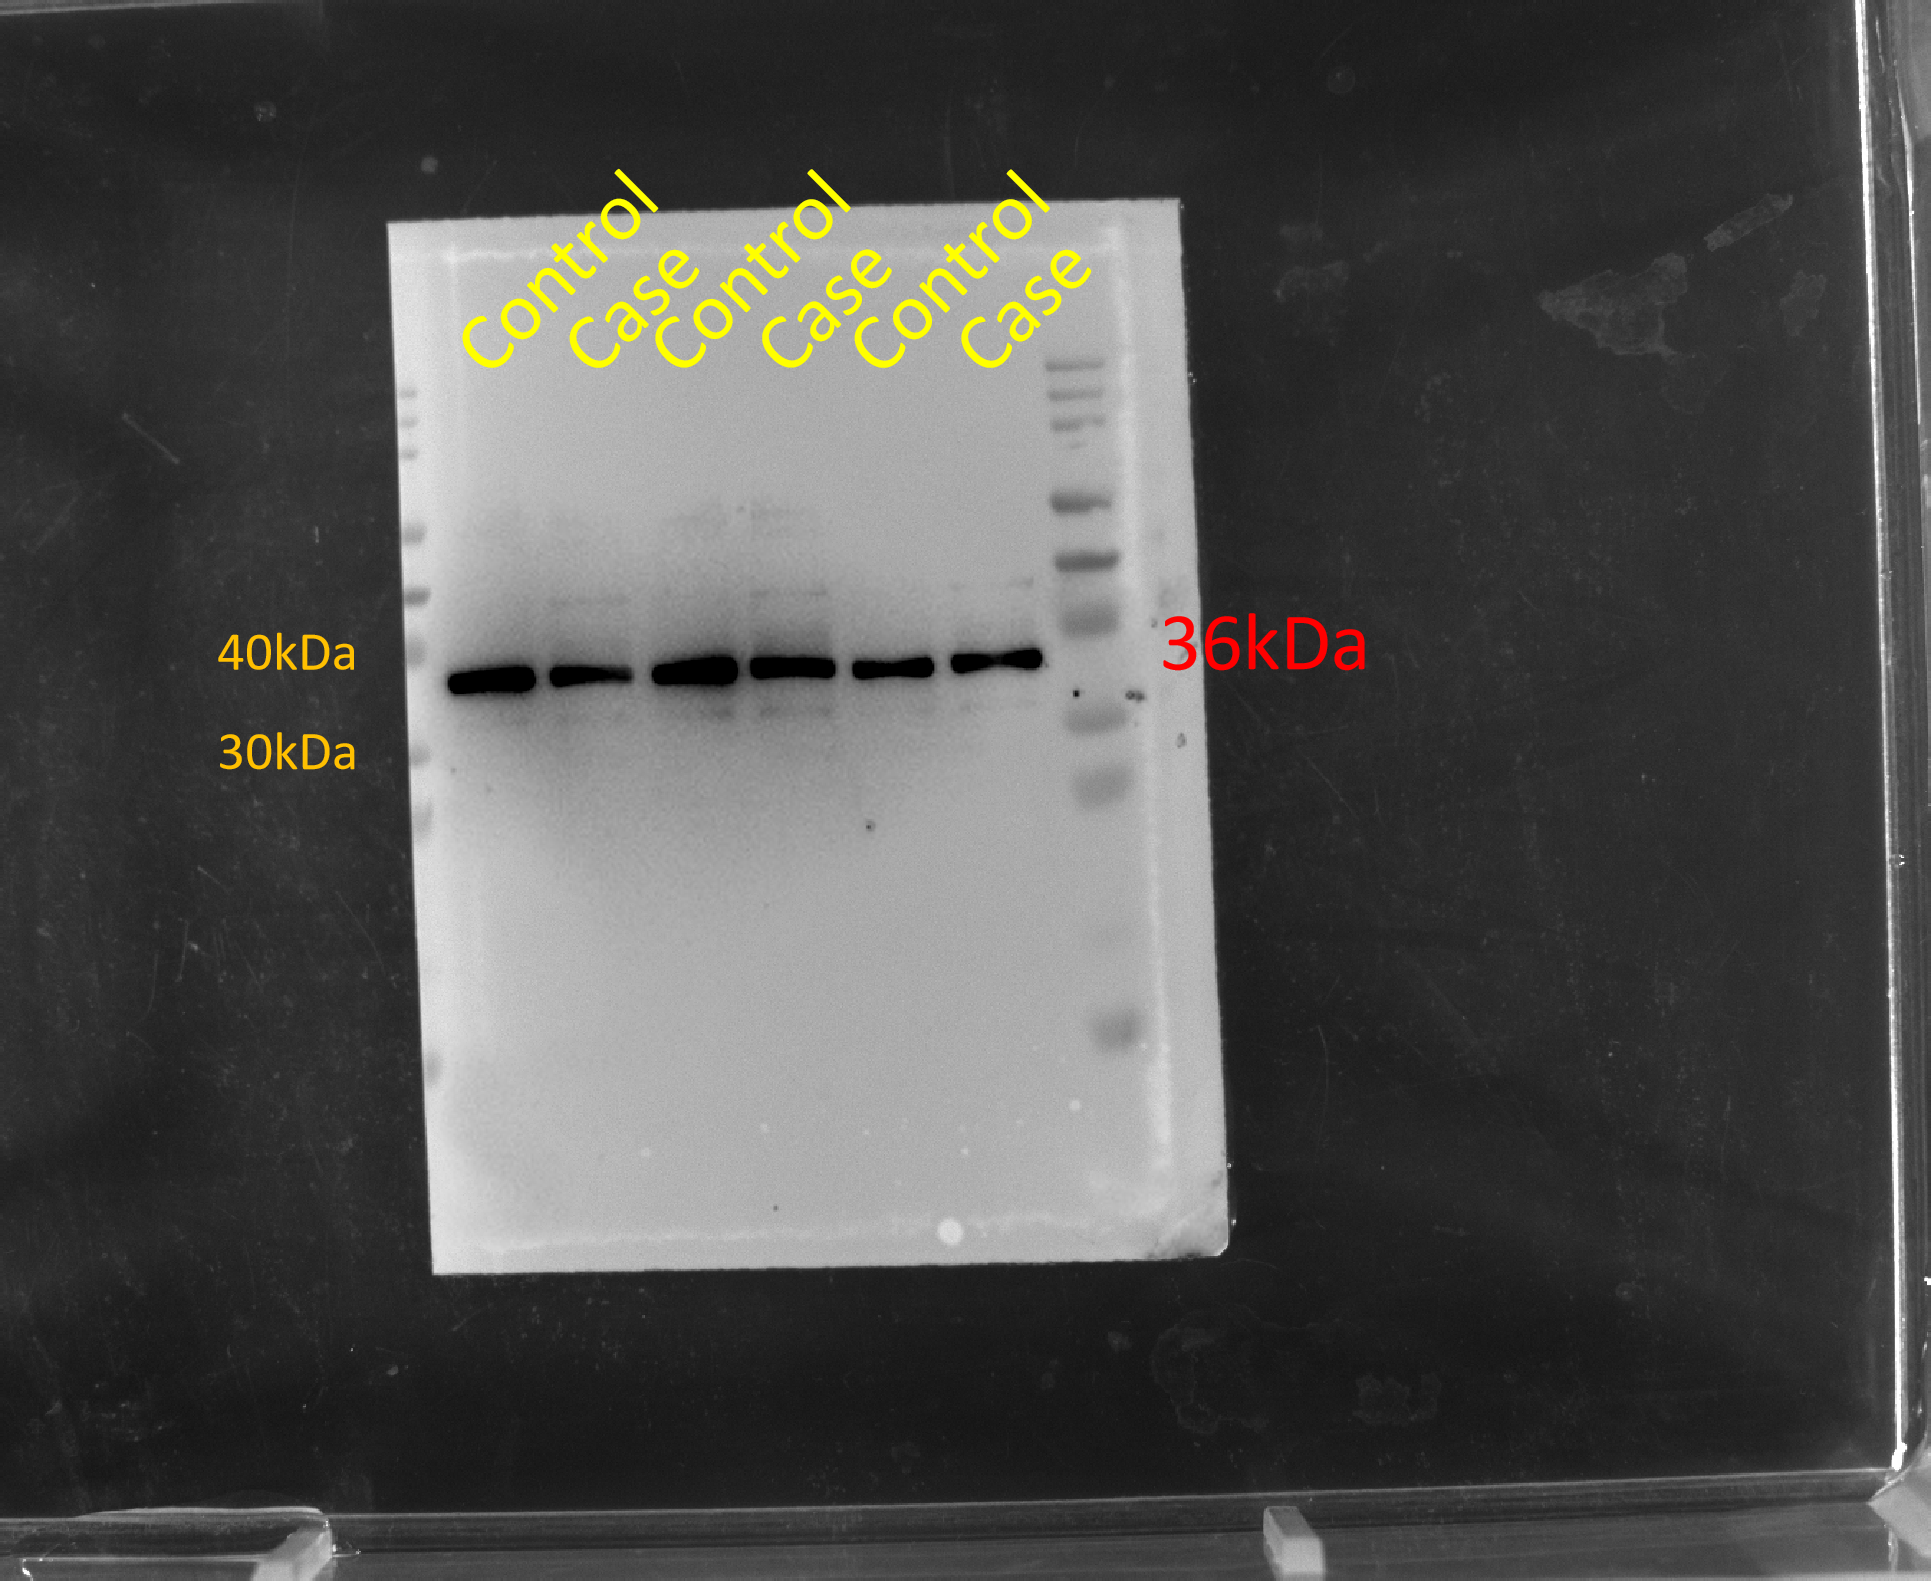

Supplement: Supplementary file 1 [file 92c5236b9b5d291e383a4cb2.docx]
